# Supplementary material for: Genome-wide discovery and validation of diagnostic DNA methylation-based biomarkers for hepatocellular cancer detection in circulating cell free DNA
Source: PubMed Central journal article supplement (PMC6831291; doi:10.7150/thno.35573), 2019-09-25
Supplement: thnov09p7239s1.pdf [file thnov09p7239s1.pdf]

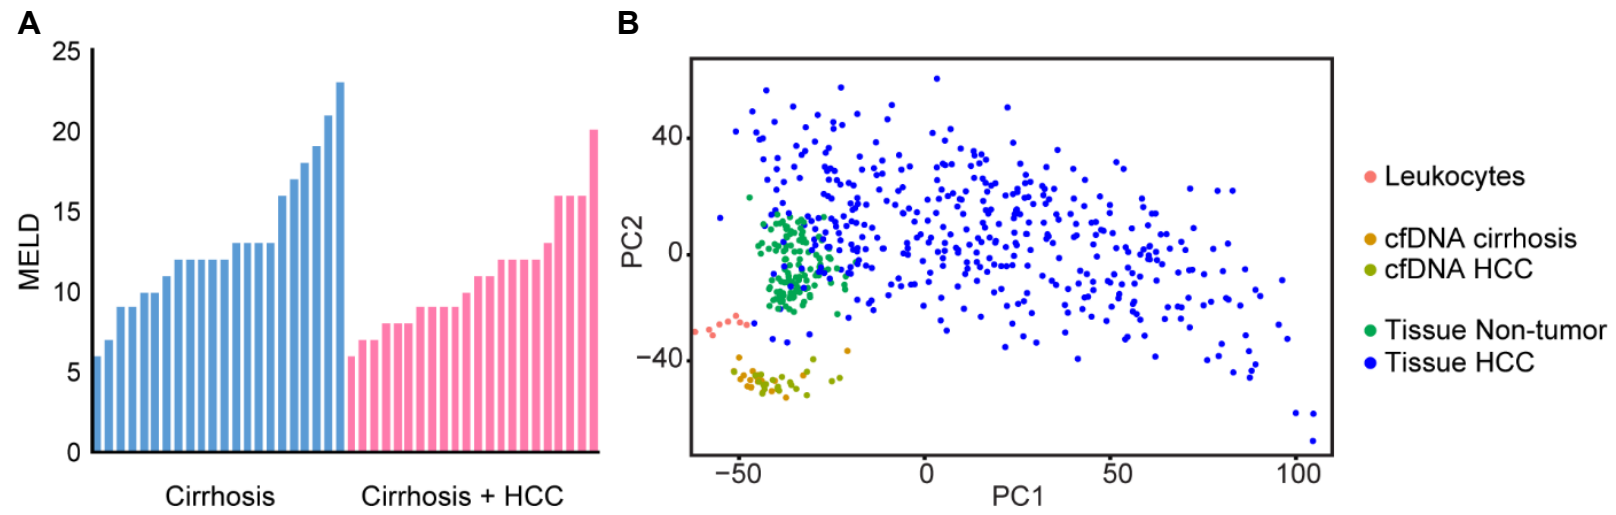

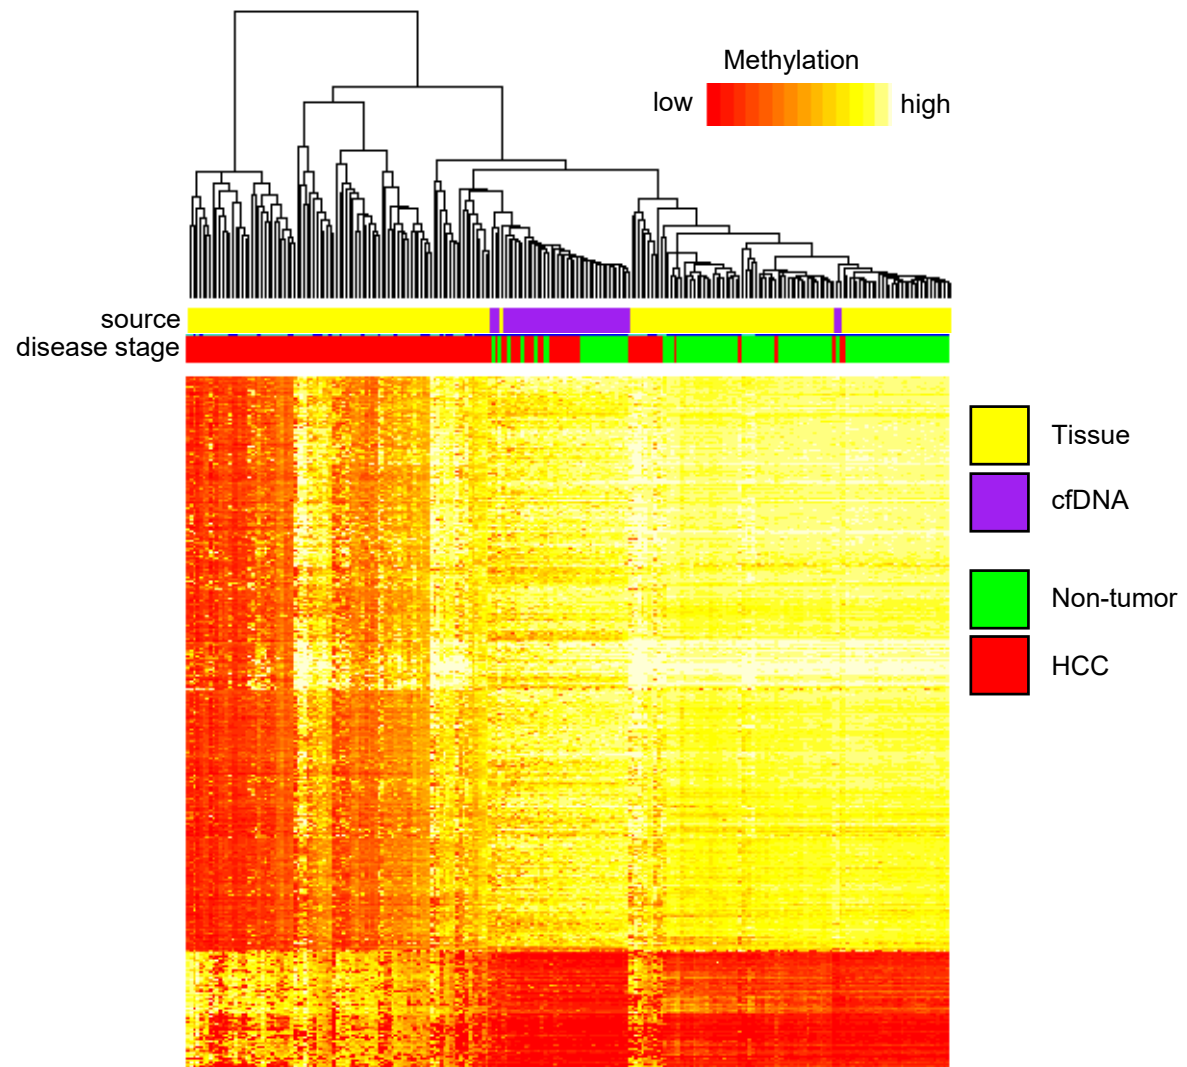

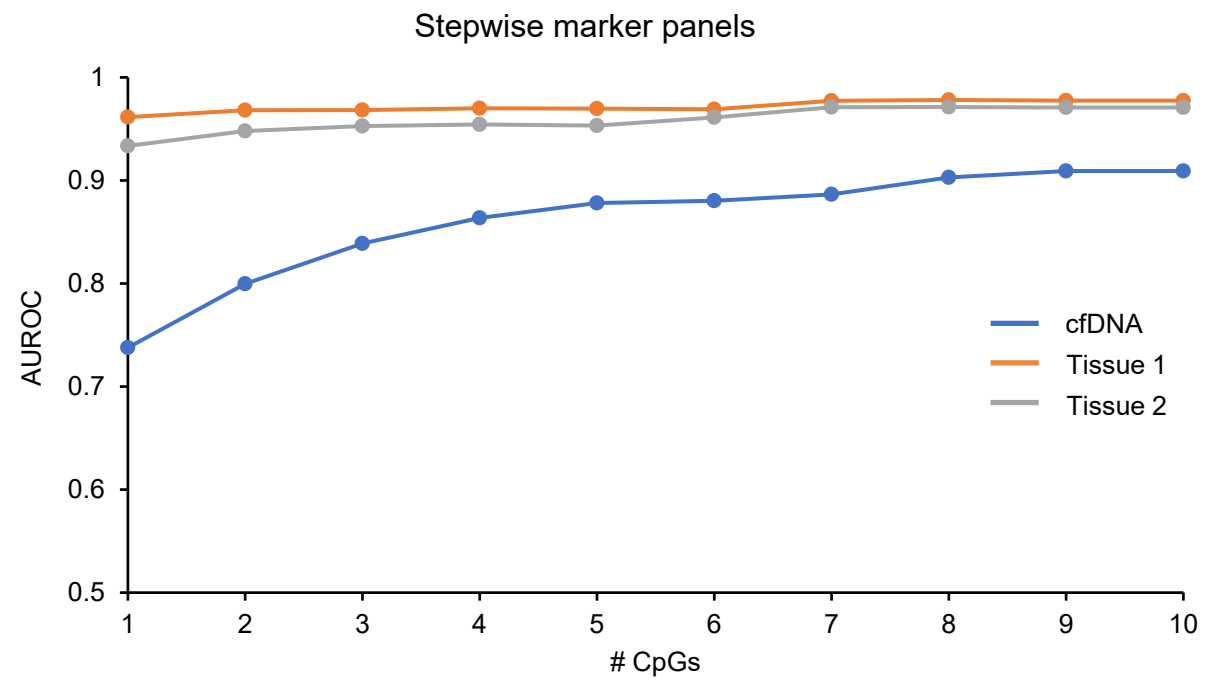

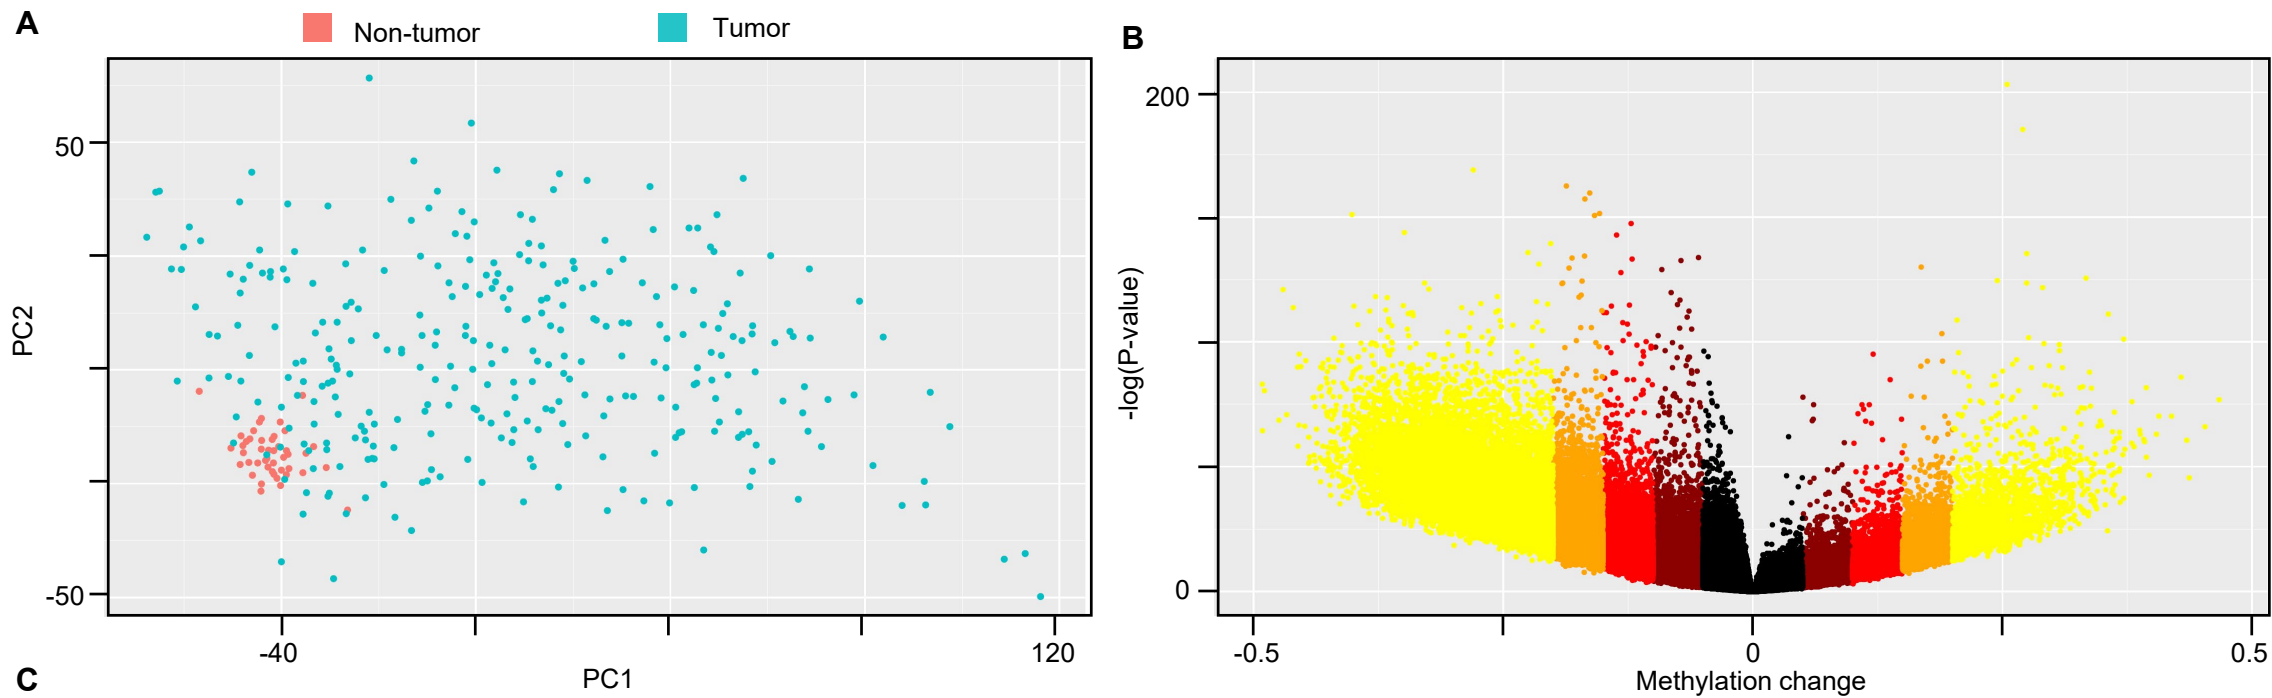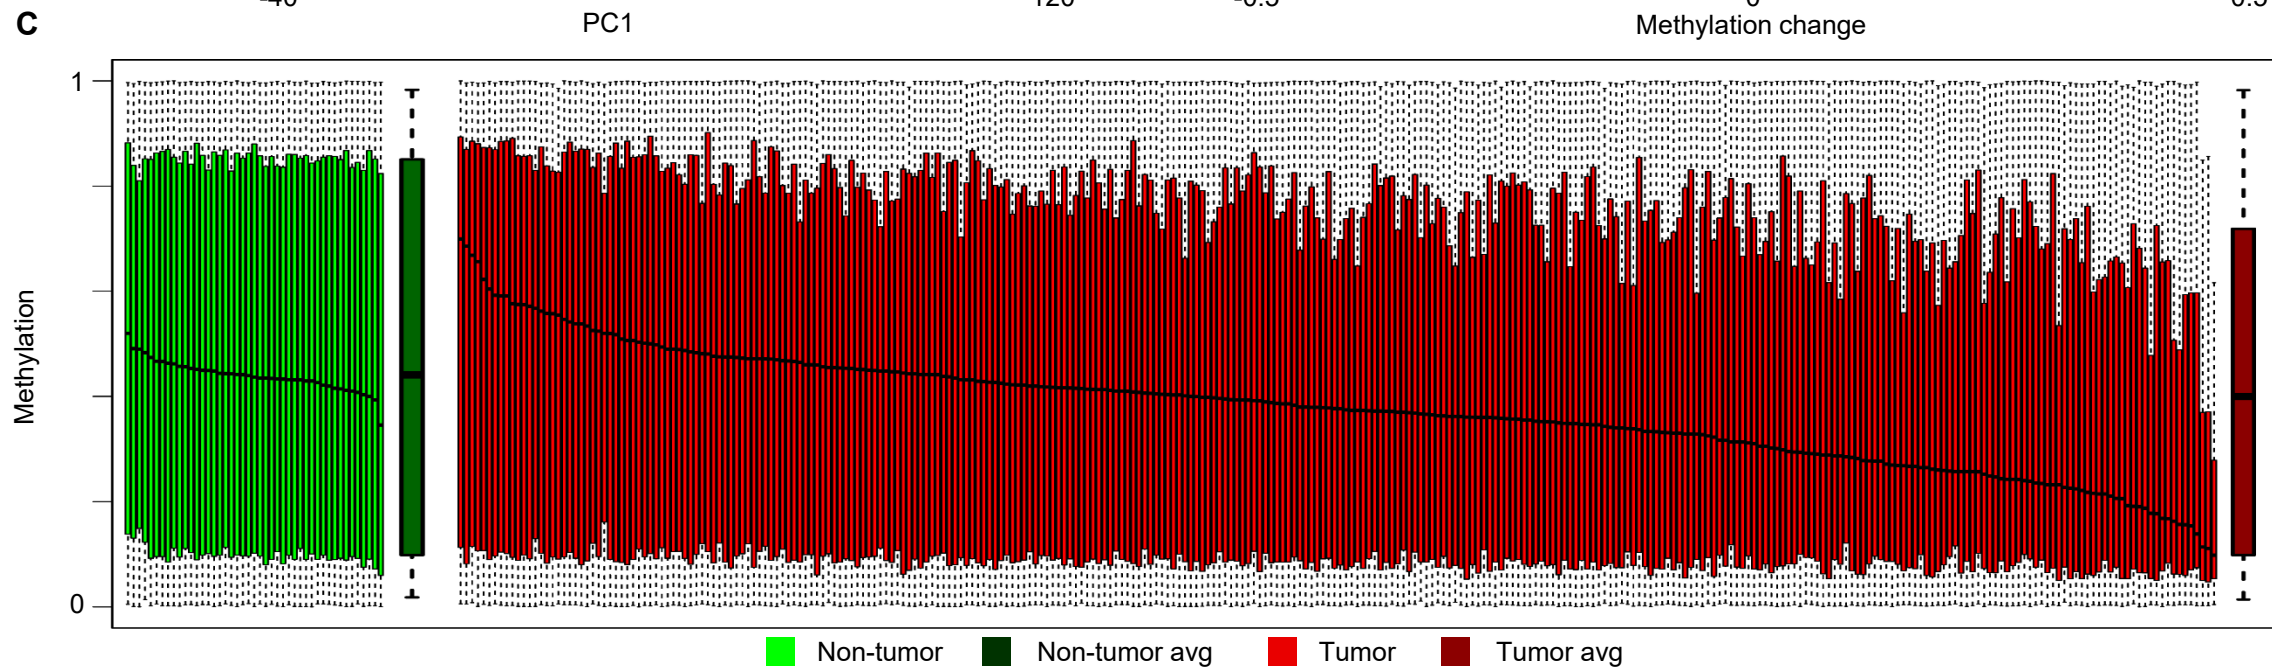

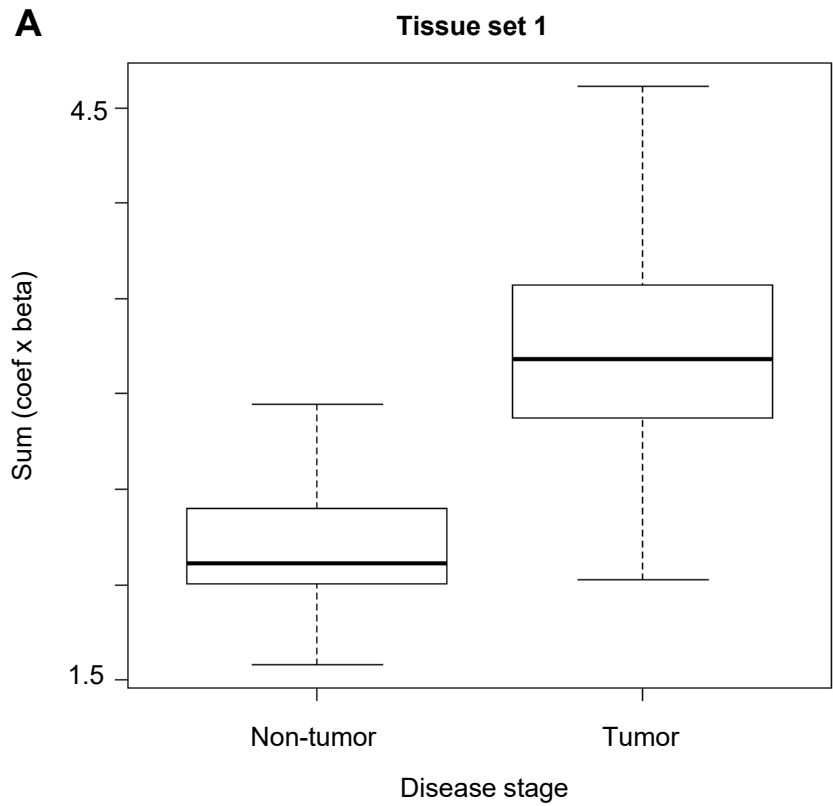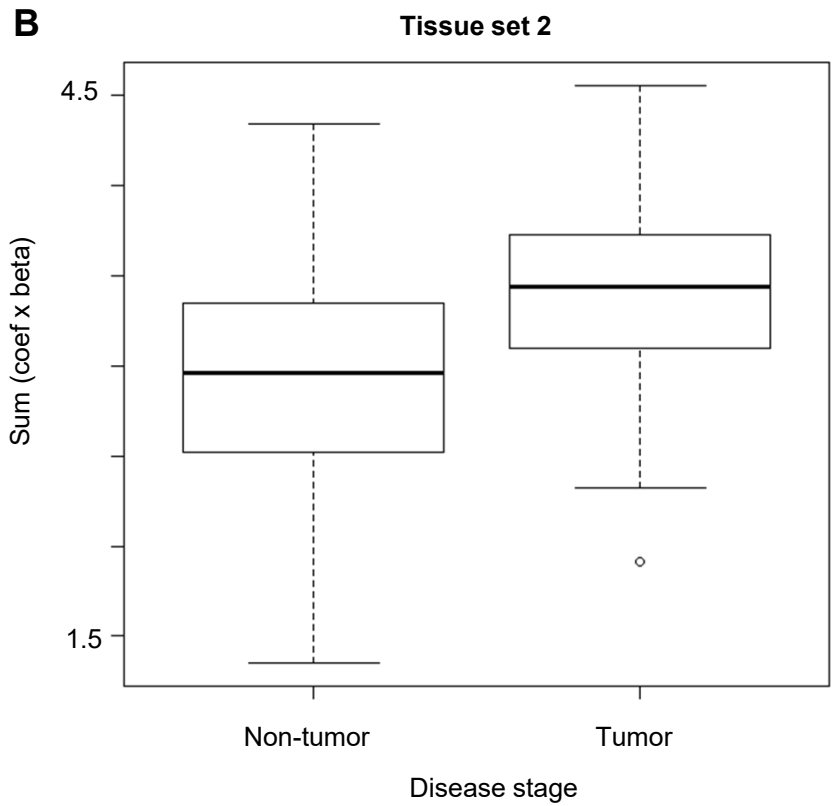

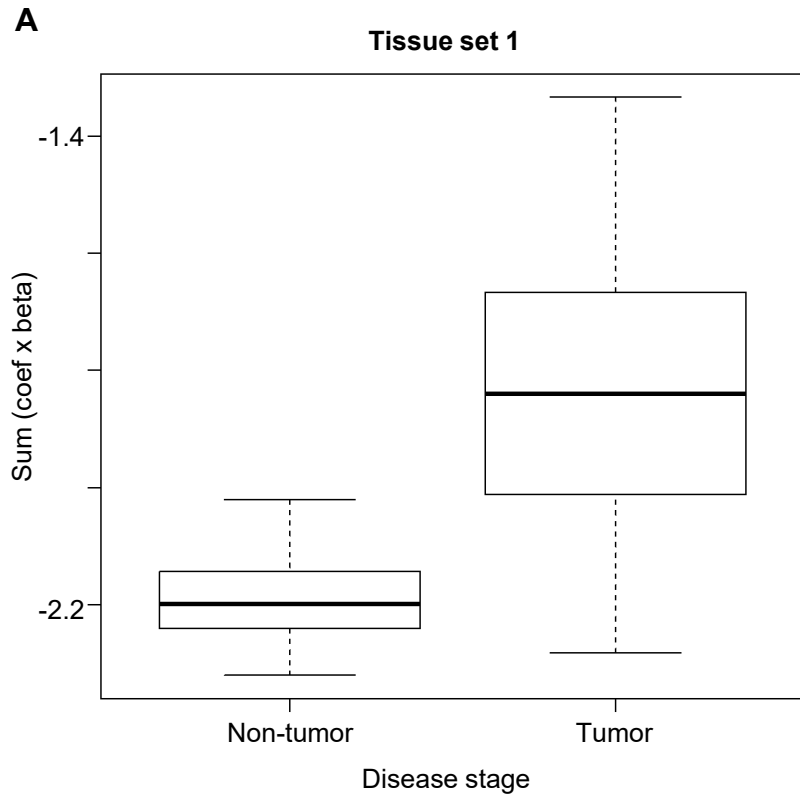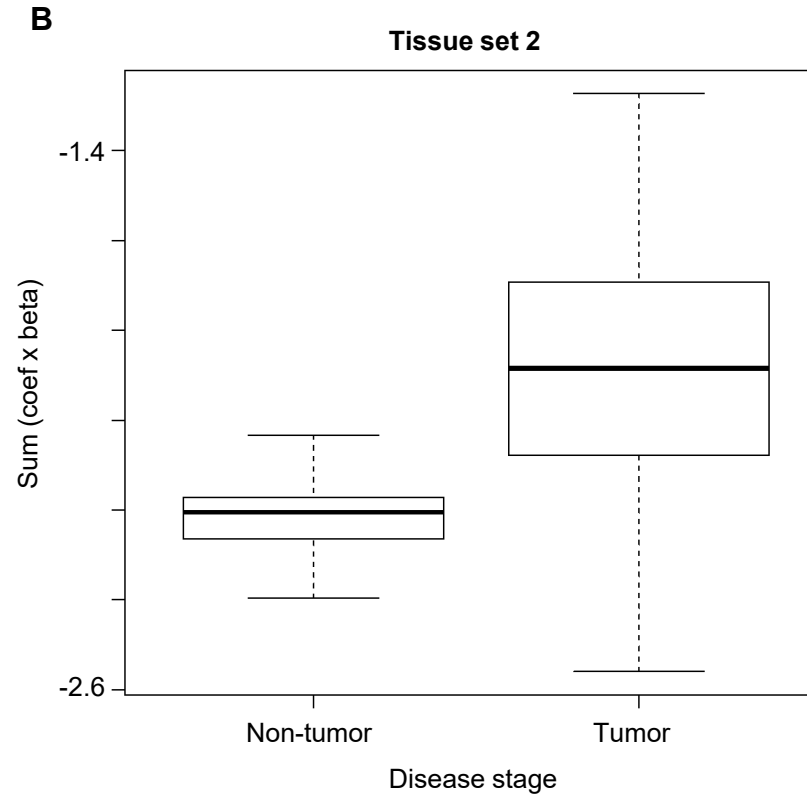

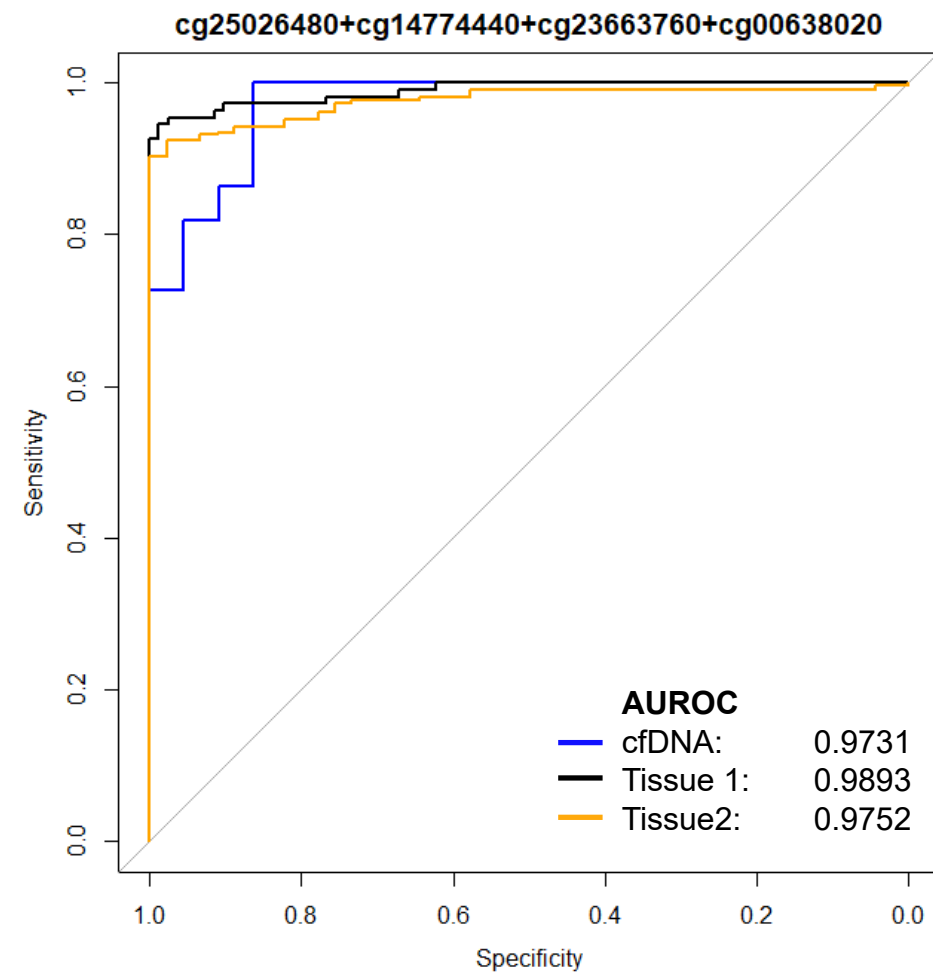

### A Methylated control

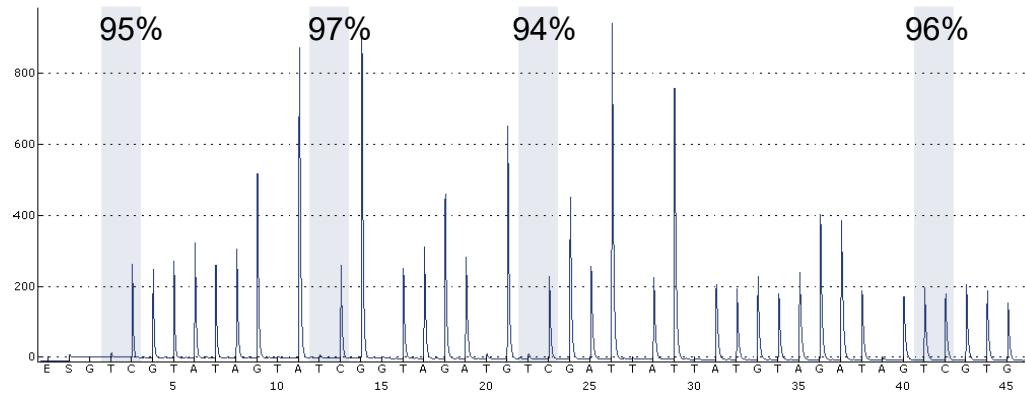

### Unmethylated control

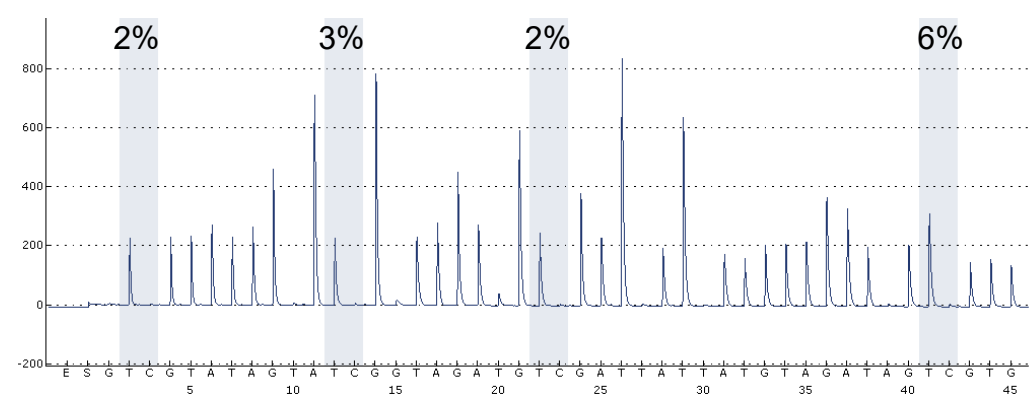

### Cirrhosis

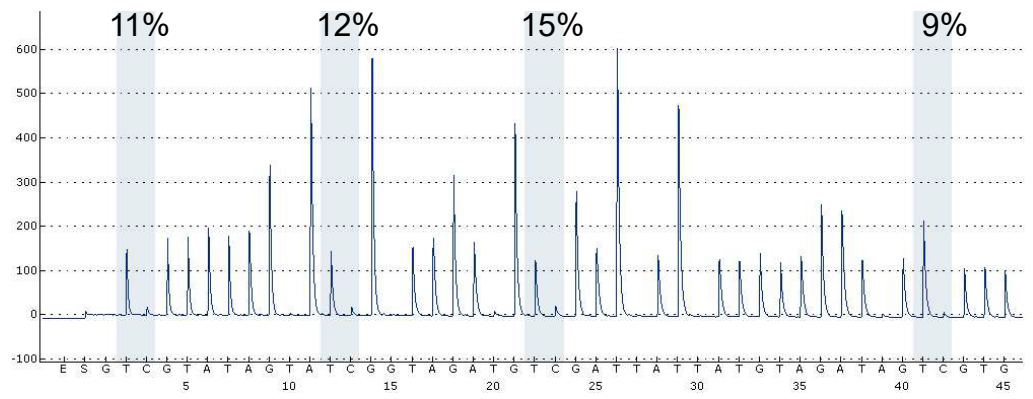

### HCC

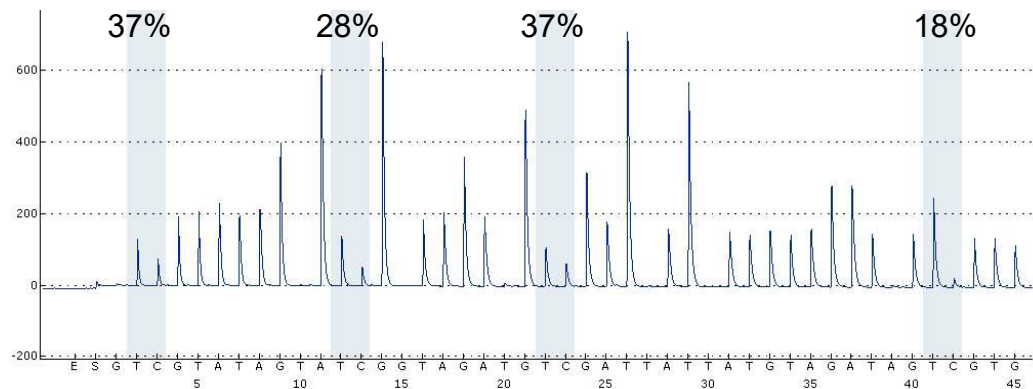

### B

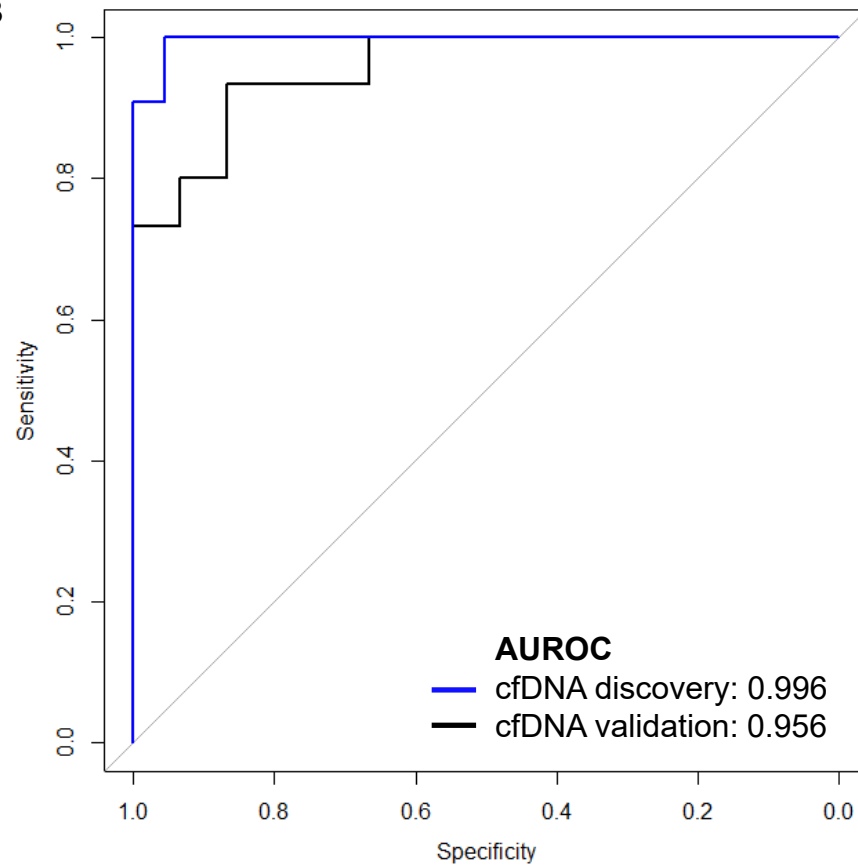



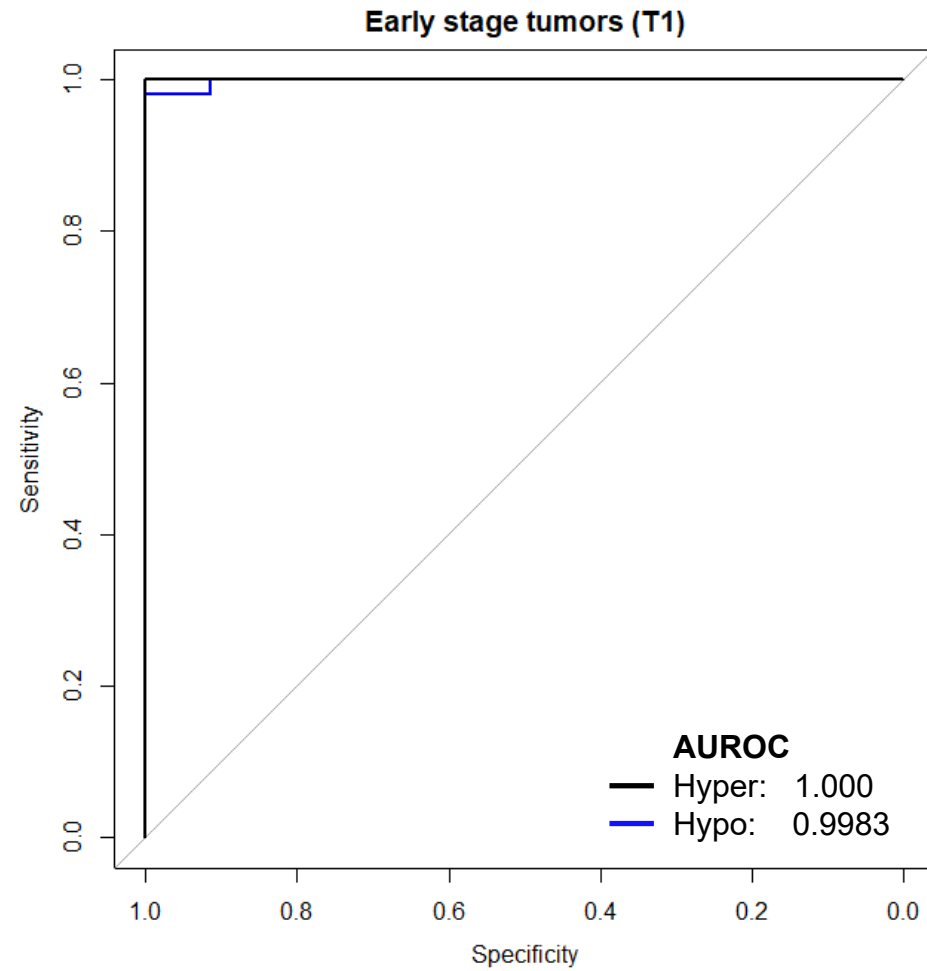

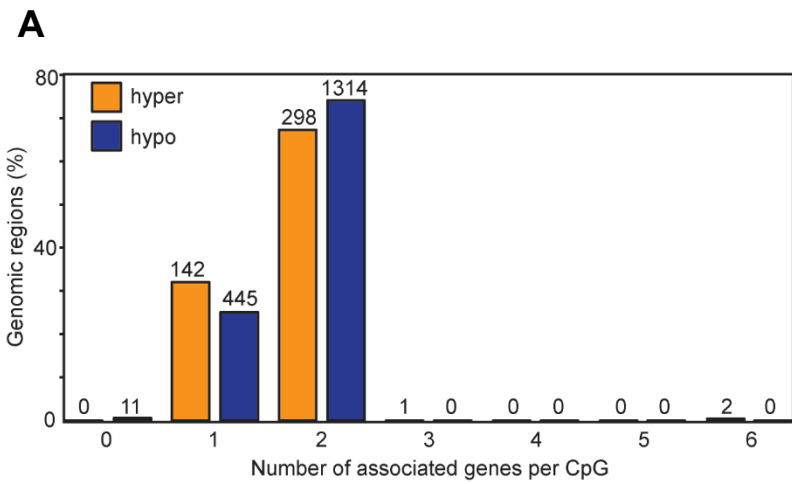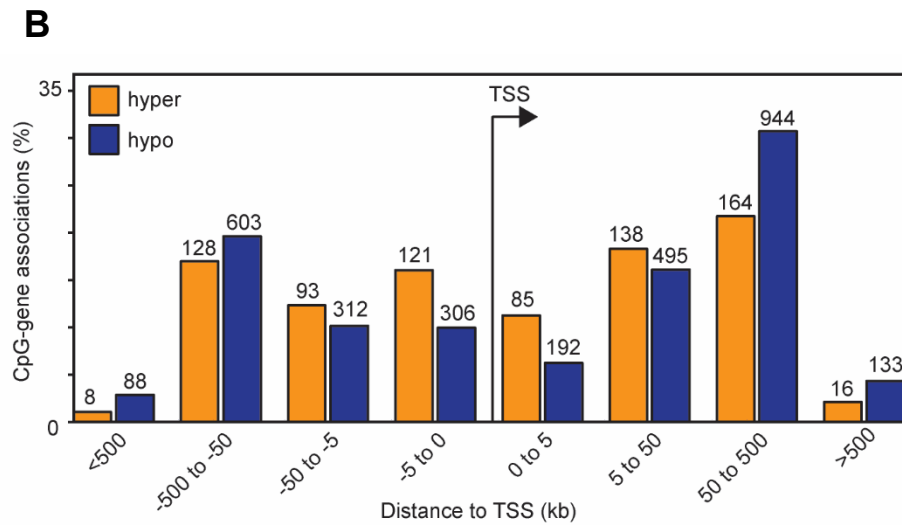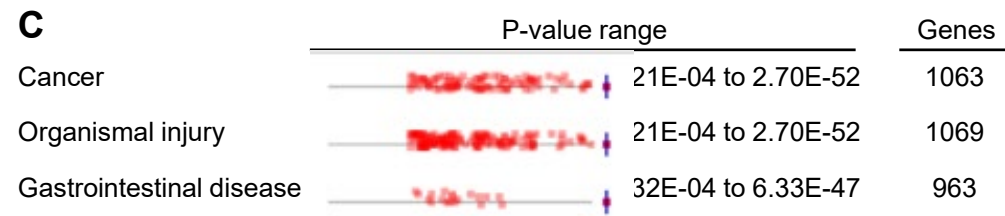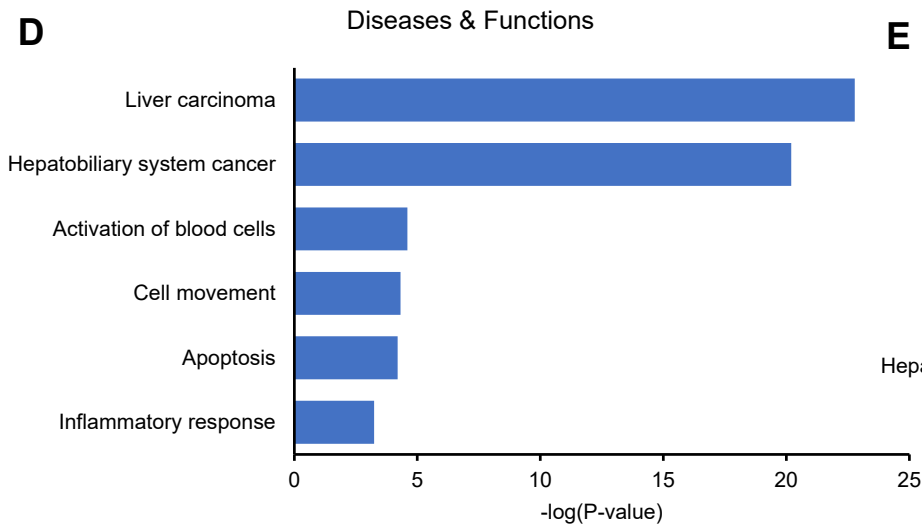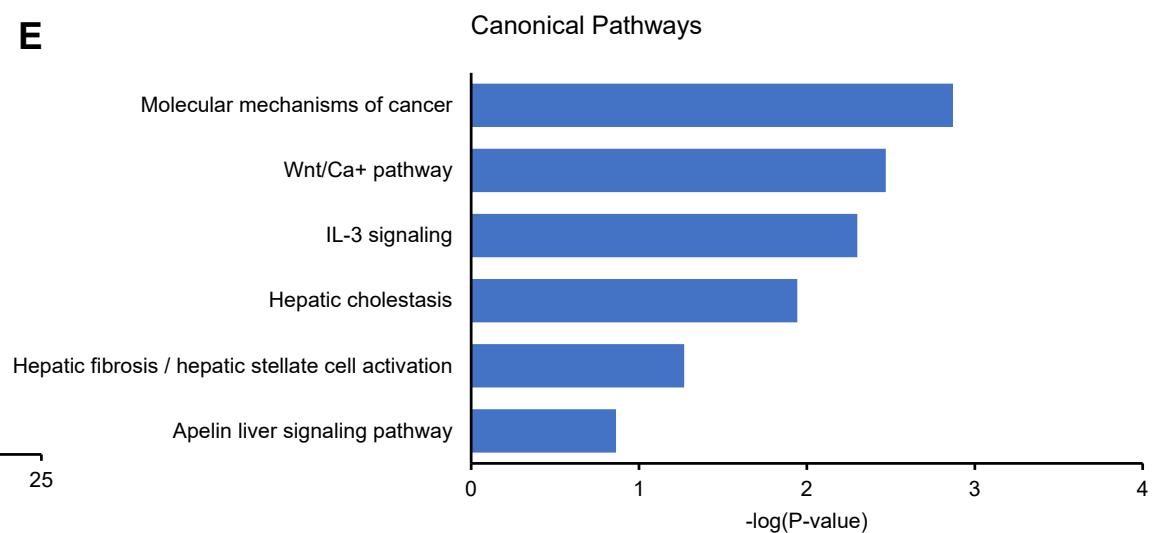

Hlady *et al.*, Supplemental Material for:

**Genome-wide discovery and validation of diagnostic DNA methylation-based biomarkers for hepatocellular cancer detection in circulating cell free DNA**

## **Supplemental Figure Legends**

**Fig. S1: Characterization of the cfDNA cohort and its relationship to public methylation datasets. A)** Bar chart depicting MELD scores for 22 cirrhosis controls (blue) and 22 cirrhosis with HCC (pink) cfDNA samples for which 450k analysis was performed. **B)** Principal component analysis using all post-quality control (QC) CpGs on the 450k array for all four datasets (cfDNA in brown/green for non-tumor/tumor respectively, normal leukocytes in peach, primary tissue sets 1 and 2 non-tumor/tumor in green/blue).

**Fig S2: Unsupervised hierarchical clustering of primary tissue and cfDNA.** A heatmap depicting primary tissue (yellow) and cfDNA-derived (purple) non-tumor (green) and tumor (red) DNA methylation data from the top 10,000 most variable CpGs. Primary non-tumor and tumor tissues segregate independently, while cfDNA is less distinctly segregated, likely due to the ‘contamination’ or mixing of DNA derived from cirrhotic portions of the liver and regions of the liver containing the HCC, for cfDNA samples derived from patients with HCC with background cirrhosis.

**Fig. S3: Performance of cfDNA marker panels in CpGs discovered from primary tissue.** A line chart depicting CpG marker panels ranging from 1 to 10 CpGs and the corresponding AUROC in cfDNA (blue), and in two independent tissue datasets (orange and grey for tissue

sets 1 and 2, respectively). Individual CpGs were stepwise added on to create increasingly more discriminating panels, which plateaued around 0.9 in cfDNA at 9 CpGs.

**Fig. S4: Basic characterization of tissue set 2 cohort. A)** Principal component analysis in n=45 non-tumor (peach) and 306 HCC (blue) tissues using all CpGs on the array after QC filtering (including removal of X, Y, and SNP-containing probes). **B)** Volcano plots of 5mC changes plotted against -log P values between non-tumor and tumor samples. Stepwise coloring of changes is based on delta beta values (0.05 increments) with black less than 0.05, dark red 0.05-0.1, red 0.1-0.15, orange 0.15-0.20, and yellow greater than 0.20. **C)** Overall methylation level bar charts (as beta value) for individual non-tumor (green), average of all non-tumor (dark green), individual tumor (red), and average of all tumor (dark red) primary tissues.

**Fig S5: Performance of the hypermethylated CpG marker panel in primary tissue discovered from cfDNA.** Boxplots of tissue set 1 (left) and tissue set 2 (right) representing the sum of 13 Lasso regression-derived CpGs from cfDNA methylation data.

**Fig S6: Performance of the hypomethylated CpG marker panel in primary tissue discovered from cfDNA.** Boxplots of tissue set 1 (left) and tissue set 2 (right) representing the sum of 10 Lasso regression-derived CpGs from cfDNA methylation data.

**Fig S7: Combined hypermethylated and hypomethylated CpG panel.** A receiver operating characteristic curve for a 4 CpG panel in cfDNA (blue), and in two independent primary tissue

sets (black, set 1; orange, set 2). CpGs used: cg2502648, cg14774440, cg23663760, cg00638020.

**Fig S8: Validation of a 5-marker CpG panel in an independent cfDNA cohort.**

**A)** Pyrograms derived from fully methylated and unmethylated control DNAs for the cg07610777-containing amplicon (top two panels). Representative examples of methylation values obtained from cirrhosis only and cirrhosis with HCC for this region derived from cfDNA (lower left two panels). **B)** Using 15 cirrhosis only and 15 cirrhosis with HCC samples, we performed bisulfite pyrosequencing on amplicons surrounding cg18054281, cg25026480, cg07610777, cg13781744, and cg04645914. The combined AUROC from discovery cfDNA 450k data was 0.996, and the validation by bisulfite pyrosequencing in 30 independent samples was 0.956.

**Fig S9: Combined hypermethylated and hypomethylated CpG panel in early stage HCC.**

A receiver operating characteristic curve for a hypermethylated (black; n=5 CpGs) and hypomethylated (blue; n=4 CpGs) CpG panels in early stage (T1) HCC using data derived from TCGA. The CpG marker panels used for this analysis are derived from Figure 4 (hypermethylated) and Figure 5 (hypomethylated).

**Fig S10: Differentially methylated CpGs from cfDNA are linked to liver cancer-related processes.**

**A)** Bar chart depicting the number of genes associated with each CpG. The majority of both hyper- (orange) and hypo-methylated (blue) CpGs are associated with 1-2 genes. **B)** The location of the same set of CpGs relative to the transcription start site (TSS) of the associated genes. **C)** An IPA summary of the categories, P-value ranges, and number of

genes associated with the overarching categories 'cancer', 'organismal injury', and 'gastrointestinal disease' linked to differentially methylated CpGs. Bar charts of diseases/functions (**D**), and canonical pathways (**E**) from IPA for genes associated with differentially methylated CpGs.

Table S1: Clinical information for patient samples used in this study.

| Tube_ID       | Source | Ishak score               | HCC | MELD | AFP   | Yield (ng/mL) | Tube_ID         | Source | Ishak score               | HCC | MELD | AFP     | Yield (ng/mL) |
|---------------|--------|---------------------------|-----|------|-------|---------------|-----------------|--------|---------------------------|-----|------|---------|---------------|
| Mayo_cDNA-1   | cfDNA  | 6 - Established Cirrhosis | no  | 18   | 5.6   | 102.84        | TCGA-DD-A1EE-11 | Tissue | 6 - Established Cirrhosis | no  | N/A  | 3       | N/A           |
| Mayo_cDNA-10  | cfDNA  | 6 - Established Cirrhosis | no  | 13   | 5.5   | 9.45          | TCGA-DD-A1EF-01 | Tissue | 3.4 - Fibrous Speta       | yes | N/A  | 16211   | N/A           |
| Mayo_cDNA-11  | cfDNA  | 6 - Established Cirrhosis | no  | 12   | 3.2   | 9.68          | TCGA-DD-A1EF-11 | Tissue | 3.4 - Fibrous Speta       | no  | N/A  | 16211   | N/A           |
| Mayo_cDNA-12  | cfDNA  | 6 - Established Cirrhosis | no  | 7    | 0.8   | 14.50         | TCGA-DD-A1EG-01 | Tissue | 1.2 - Portal Fibrosis     | yes | N/A  | 16      | N/A           |
| Mayo_cDNA-13  | cfDNA  | 6 - Established Cirrhosis | no  | 12   | 1.9   | 11.31         | TCGA-DD-A1EG-11 | Tissue | 1.2 - Portal Fibrosis     | no  | N/A  | 16      | N/A           |
| Mayo_cDNA-14  | cfDNA  | 6 - Established Cirrhosis | no  | 12   | 2     | 13.71         | TCGA-DD-A1EH-01 | Tissue | 3.4 - Fibrous Speta       | yes | N/A  | 94340   | N/A           |
| Mayo_cDNA-15  | cfDNA  | 6 - Established Cirrhosis | no  | 21   | 2.2   | 9.09          | TCGA-DD-A1EH-11 | Tissue | 3.4 - Fibrous Speta       | no  | N/A  | 94340   | N/A           |
| Mayo_cDNA-16  | cfDNA  | 6 - Established Cirrhosis | no  | 11   | 3.4   | 42.38         | TCGA-DD-A1EI-01 | Tissue | 6 - Established Cirrhosis | yes | N/A  | 24      | N/A           |
| Mayo_cDNA-17  | cfDNA  | 6 - Established Cirrhosis | no  | 13   | 2.9   | 21.30         | TCGA-DD-A1EI-11 | Tissue | 6 - Established Cirrhosis | no  | N/A  | 24      | N/A           |
| Mayo_cDNA-18  | cfDNA  | 6 - Established Cirrhosis | no  | 23   | 4.6   | 26.16         | TCGA-DD-A1EJ-01 | Tissue | 0 - No Fibrosis           | yes | N/A  | 18840   | N/A           |
| Mayo_cDNA-19  | cfDNA  | 6 - Established Cirrhosis | no  | 6    | 0.8   | 84.96         | TCGA-DD-A1EJ-11 | Tissue | 0 - No Fibrosis           | no  | N/A  | 18840   | N/A           |
| Mayo_cDNA-2   | cfDNA  | 6 - Established Cirrhosis | no  | 10   | 2.3   | 16.56         | TCGA-DD-A1EK-01 | Tissue | 0 - No Fibrosis           | yes | N/A  | 19      | N/A           |
| Mayo_cDNA-21  | cfDNA  | 6 - Established Cirrhosis | no  | 10   | N/A   | 9.93          | TCGA-DD-A1EL-01 | Tissue | 0 - No Fibrosis           | yes | N/A  | 5       | N/A           |
| Mayo_cDNA-22  | cfDNA  | 6 - Established Cirrhosis | no  | 12   | 1.7   | 11.46         | TCGA-DD-A1EL-11 | Tissue | 0 - No Fibrosis           | no  | N/A  | 5       | N/A           |
| Mayo_cDNA-23  | cfDNA  | 6 - Established Cirrhosis | no  | 12   | N/A   | 9.68          | TCGA-DD-A39V-01 | Tissue | 0 - No Fibrosis           | yes | N/A  | NA      | N/A           |
| Mayo_cDNA-24  | cfDNA  | 6 - Established Cirrhosis | no  | 9    | 3.2   | 9.56          | TCGA-DD-A39V-11 | Tissue | 0 - No Fibrosis           | no  | N/A  | NA      | N/A           |
| Mayo_cDNA-25  | cfDNA  | 6 - Established Cirrhosis | no  | 9    | N/A   | 32.64         | TCGA-DD-A39W-01 | Tissue | NA                        | yes | N/A  | NA      | N/A           |
| Mayo_cDNA-27  | cfDNA  | 6 - Established Cirrhosis | yes | 16   | 6949  | 12.61         | TCGA-DD-A39W-11 | Tissue | NA                        | no  | N/A  | NA      | N/A           |
| Mayo_cDNA-29  | cfDNA  | 6 - Established Cirrhosis | yes | 8    | 42400 | 208.08        | TCGA-DD-A39X-01 | Tissue | 0 - No Fibrosis           | yes | N/A  | 10      | N/A           |
| Mayo_cDNA-3   | cfDNA  | 6 - Established Cirrhosis | no  | 19   | 4.8   | 16.59         | TCGA-DD-A39X-11 | Tissue | 0 - No Fibrosis           | no  | N/A  | 10      | N/A           |
| Mayo_cDNA-30  | cfDNA  | 6 - Established Cirrhosis | yes | 9    | 107   | 9.45          | TCGA-DD-A39Y-01 | Tissue | 0 - No Fibrosis           | yes | N/A  | 5600    | N/A           |
| Mayo_cDNA-33  | cfDNA  | 6 - Established Cirrhosis | yes | 12   | 303   | 13.66         | TCGA-DD-A39Z-01 | Tissue | NA                        | yes | N/A  | NA      | N/A           |
| Mayo_cDNA-34  | cfDNA  | 6 - Established Cirrhosis | yes | 10   | 1495  | 10.19         | TCGA-DD-A39Z-11 | Tissue | NA                        | no  | N/A  | NA      | N/A           |
| Mayo_cDNA-37  | cfDNA  | 6 - Established Cirrhosis | yes | 8    | 21    | 10.89         | TCGA-DD-A3A0-01 | Tissue | 0 - No Fibrosis           | yes | N/A  | 1       | N/A           |
| Mayo_cDNA-38  | cfDNA  | 6 - Established Cirrhosis | yes | 6    | 3     | 18.73         | TCGA-DD-A3A1-01 | Tissue | 0 - No Fibrosis           | yes | N/A  | 6       | N/A           |
| Mayo_cDNA-39  | cfDNA  | 6 - Established Cirrhosis | yes | 11   | 66    | 10.72         | TCGA-DD-A3A1-11 | Tissue | 0 - No Fibrosis           | no  | N/A  | 6       | N/A           |
| Mayo_cDNA-40  | cfDNA  | 6 - Established Cirrhosis | yes | 9    | 3.7   | 19.05         | TCGA-DD-A3A2-01 | Tissue | 0 - No Fibrosis           | yes | N/A  | NA      | N/A           |
| Mayo_cDNA-42  | cfDNA  | 6 - Established Cirrhosis | yes | 12   | 9312  | 8.10          | TCGA-DD-A3A2-11 | Tissue | 0 - No Fibrosis           | no  | N/A  | NA      | N/A           |
| Mayo_cDNA-43  | cfDNA  | 6 - Established Cirrhosis | yes | 13   | 7.1   | 17.41         | TCGA-DD-A3A3-01 | Tissue | 0 - No Fibrosis           | yes | N/A  | 6       | N/A           |
| Mayo_cDNA-46  | cfDNA  | 6 - Established Cirrhosis | yes | 9    | 6.8   | 21.64         | TCGA-DD-A3A3-11 | Tissue | 0 - No Fibrosis           | no  | N/A  | 6       | N/A           |
| Mayo_cDNA-48  | cfDNA  | 6 - Established Cirrhosis | yes | 7    | 6.8   | 32.48         | TCGA-DD-A3A4-01 | Tissue | 0 - No Fibrosis           | yes | N/A  | NA      | N/A           |
| Mayo_cDNA-53  | cfDNA  | 6 - Established Cirrhosis | yes | 11   | 2787  | 9.34          | TCGA-DD-A3A5-01 | Tissue | 0 - No Fibrosis           | yes | N/A  | 55      | N/A           |
| Mayo_cDNA-54  | cfDNA  | 6 - Established Cirrhosis | yes | 16   | 171   | 9.71          | TCGA-DD-A3A6-01 | Tissue | 0 - No Fibrosis           | yes | N/A  | NA      | N/A           |
| Mayo_cDNA-55  | cfDNA  | 6 - Established Cirrhosis | yes | 20   | 3.8   | 8.83          | TCGA-DD-A3A7-01 | Tissue | 0 - No Fibrosis           | yes | N/A  | 120     | N/A           |
| Mayo_cDNA-56  | cfDNA  | 6 - Established Cirrhosis | yes | 9    | 5.2   | 8.92          | TCGA-DD-A3A8-01 | Tissue | 0 - No Fibrosis           | yes | N/A  | 4       | N/A           |
| Mayo_cDNA-58  | cfDNA  | 6 - Established Cirrhosis | yes | 12   | 42348 | 27.31         | TCGA-DD-A3A9-01 | Tissue | 0 - No Fibrosis           | yes | N/A  | 19930   | N/A           |
| Mayo_cDNA-59  | cfDNA  | 6 - Established Cirrhosis | yes | 8    | 12    | 20.48         | TCGA-DD-A1EB-01 | Tissue | 0 - No Fibrosis           | yes | N/A  | 7       | N/A           |
| Mayo_cDNA-6   | cfDNA  | 6 - Established Cirrhosis | no  | 16   | 8.6   | 49.04         | TCGA-DD-A4NB-01 | Tissue | NA                        | yes | N/A  | 3       | N/A           |
| Mayo_cDNA-62  | cfDNA  | 6 - Established Cirrhosis | yes | 16   | 270   | 34.28         | TCGA-DD-A4ND-01 | Tissue | 0 - No Fibrosis           | yes | N/A  | NA      | N/A           |
| Mayo_cDNA-65  | cfDNA  | 6 - Established Cirrhosis | yes | 7    | 104   | 12.39         | TCGA-DD-A4NE-01 | Tissue | 0 - No Fibrosis           | yes | N/A  | 28      | N/A           |
| Mayo_cDNA-67  | cfDNA  | 6 - Established Cirrhosis | yes | 12   | 17    | 13.32         | TCGA-DD-A4NF-01 | Tissue | 6 - Established Cirrhosis | yes | N/A  | 6       | N/A           |
| Mayo_cDNA-7   | cfDNA  | 6 - Established Cirrhosis | no  | 13   | 4.3   | 11.74         | TCGA-DD-A4NG-01 | Tissue | NA                        | yes | N/A  | 3       | N/A           |
| Mayo_cDNA-8   | cfDNA  | 6 - Established Cirrhosis | no  | 17   | 6     | 12.47         | TCGA-DD-A4NH-01 | Tissue | 1.2 - Portal Fibrosis     | yes | N/A  | 92889   | N/A           |
| Mayo_cDNA-9   | cfDNA  | 6 - Established Cirrhosis | no  | 13   | 2.9   | 18.03         | TCGA-DD-A4NI-01 | Tissue | 0 - No Fibrosis           | yes | N/A  | 6       | N/A           |
| Cbl-100       | Tissue | 6 - Established Cirrhosis | no  | N/A  | N/A   | N/A           | TCGA-DD-A4NJ-01 | Tissue | 1.2 - Portal Fibrosis     | yes | N/A  | 5       | N/A           |
| Cbl-165       | Tissue | 6 - Established Cirrhosis | no  | N/A  | N/A   | N/A           | TCGA-DD-A4NK-01 | Tissue | 0 - No Fibrosis           | yes | N/A  | 3       | N/A           |
| CC-109        | Tissue | 6 - Established Cirrhosis | no  | N/A  | N/A   | N/A           | TCGA-DD-A4NL-01 | Tissue | 0 - No Fibrosis           | yes | N/A  | 2       | N/A           |
| CC-144        | Tissue | 6 - Established Cirrhosis | no  | N/A  | N/A   | N/A           | TCGA-DD-A4NN-01 | Tissue | 0 - No Fibrosis           | yes | N/A  | 4223    | N/A           |
| CC-4          | Tissue | 6 - Established Cirrhosis | no  | N/A  | N/A   | N/A           | TCGA-DD-A4NO-01 | Tissue | 0 - No Fibrosis           | yes | N/A  | 3       | N/A           |
| CG-197        | Tissue | 6 - Established Cirrhosis | no  | N/A  | N/A   | N/A           | TCGA-DD-A4NP-01 | Tissue | 0 - No Fibrosis           | yes | N/A  | 2       | N/A           |
| CG-512        | Tissue | 6 - Established Cirrhosis | no  | N/A  | N/A   | N/A           | TCGA-DD-A4NQ-01 | Tissue | NA                        | yes | N/A  | 141     | N/A           |
| CG-518        | Tissue | 6 - Established Cirrhosis | no  | N/A  | N/A   | N/A           | TCGA-DD-A4NR-01 | Tissue | 6 - Established Cirrhosis | yes | N/A  | 40250   | N/A           |
| CG-563N       | Tissue | 6 - Established Cirrhosis | no  | N/A  | N/A   | N/A           | TCGA-DD-A4NS-01 | Tissue | 0 - No Fibrosis           | yes | N/A  | 2       | N/A           |
| CI-131        | Tissue | 6 - Established Cirrhosis | no  | N/A  | N/A   | N/A           | TCGA-DD-A4NV-01 | Tissue | 0 - No Fibrosis           | yes | N/A  | 3       | N/A           |
| CI-460        | Tissue | 6 - Established Cirrhosis | no  | N/A  | N/A   | N/A           | TCGA-DD-A73A-01 | Tissue | 3.4 - Fibrous Speta       | yes | N/A  | 4       | N/A           |
| CirrEIOH-110N | Tissue | 6 - Established Cirrhosis | no  | N/A  | N/A   | N/A           | TCGA-DD-A73B-01 | Tissue | 6 - Established Cirrhosis | yes | N/A  | 30      | N/A           |
| CirrEIOH-12   | Tissue | 6 - Established Cirrhosis | no  | N/A  | N/A   | N/A           | TCGA-DD-A73C-01 | Tissue | 0 - No Fibrosis           | yes | N/A  | 3       | N/A           |
| CirrEIOH-133  | Tissue | 6 - Established Cirrhosis | no  | N/A  | N/A   | N/A           | TCGA-DD-A73D-01 | Tissue | 6 - Established Cirrhosis | yes | N/A  | 4       | N/A           |
| CirrEIOH-163  | Tissue | 6 - Established Cirrhosis | no  | N/A  | N/A   | N/A           | TCGA-DD-A73E-01 | Tissue | 0 - No Fibrosis           | yes | N/A  | 1       | N/A           |
| CirrEIOH-167  | Tissue | 6 - Established Cirrhosis | no  | N/A  | N/A   | N/A           | TCGA-DD-A73F-01 | Tissue | 0 - No Fibrosis           | yes | N/A  | 283     | N/A           |
| CirrEIOH-175  | Tissue | 6 - Established Cirrhosis | no  | N/A  | N/A   | N/A           | TCGA-DD-A73G-01 | Tissue | 0 - No Fibrosis           | yes | N/A  | 2035400 | N/A           |
| CirrEIOH-180  | Tissue | 6 - Established Cirrhosis | no  | N/A  | N/A   | N/A           | TCGA-DD-AA3A-01 | Tissue | 0 - No Fibrosis           | yes | N/A  | 1       | N/A           |
| CirrEIOH-190  | Tissue | 6 - Established Cirrhosis | no  | N/A  | N/A   | N/A           | TCGA-DD-AA3C-01 | Tissue | 1.2 - Portal Fibrosis     | yes | N/A  | 1       | N/A           |
| CirrEIOH-191  | Tissue | 6 - Established Cirrhosis | no  | N/A  | N/A   | N/A           | TCGA-DD-AA3D-01 | Tissue | 6 - Established Cirrhosis | yes | N/A  | 5       | N/A           |
| CirrEIOH-380  | Tissue | 6 - Established Cirrhosis | no  | N/A  | N/A   | N/A           | TCGA-DD-AA3E-01 | Tissue | 6 - Established Cirrhosis | yes | N/A  | 7       | N/A           |
| CirrEIOH-415N | Tissue | 6 - Established Cirrhosis | no  | N/A  | N/A   | N/A           | TCGA-DD-AA3F-01 | Tissue | 6 - Established Cirrhosis | yes | N/A  | 7       | N/A           |
| CirrEIOH-444N | Tissue | 6 - Established Cirrhosis | no  | N/A  | N/A   | N/A           | TCGA-DD-AA3G-01 | Tissue | 6 - Established Cirrhosis | yes | N/A  | 1902    | N/A           |
| CirrEIOH-466N | Tissue | 6 - Established Cirrhosis | no  | N/A  | N/A   | N/A           | TCGA-DD-AA3H-01 | Tissue | 6 - Established Cirrhosis | yes | N/A  | 24      | N/A           |
| CirrEIOH-515N | Tissue | 6 - Established Cirrhosis | no  | N/A  | N/A   | N/A           | TCGA-DD-AA3I-01 | Tissue | 1.2 - Portal Fibrosis     | yes | N/A  | 2       | N/A           |
| CirrEIOH-562N | Tissue | 6 - Established Cirrhosis | no  | N/A  | N/A   | N/A           | TCGA-DD-AA3J-01 | Tissue | 6 - Established Cirrhosis | yes | N/A  | 2       | N/A           |
| CirrEIOH-57   | Tissue | 6 - Established Cirrhosis | no  | N/A  | N/A   | N/A           | TCGA-DD-AA3K-01 | Tissue | 6 - Established Cirrhosis | yes | N/A  | 16      | N/A           |
| CirrEIOH-649N | Tissue | 6 - Established Cirrhosis | no  | N/A  | N/A   | N/A           | TCGA-DD-AA3L-01 | Tissue | 6 - Established Cirrhosis | yes | N/A  | 11718   | N/A           |
| CirrEIOH-665N | Tissue | 6 - Established Cirrhosis | no  | N/A  | N/A   | N/A           | TCGA-DD-AA3M-01 | Tissue | 6 - Established Cirrhosis | yes | N/A  | 7       | N/A           |
| CirrEIOH-674N | Tissue | 6 - Established Cirrhosis | no  | N/A  | N/A   | N/A           | TCGA-DD-A1EB-11 | Tissue | 0 - No Fibrosis           | no  | N/A  | 7       | N/A           |
| CirrEIOH-9    | Tissue | 6 - Established Cirrhosis | no  | N/A  | N/A   | N/A           | TCGA-DD-AA3J-01 | Tissue | NA                        | yes | N/A  | 25      | N/A           |
| CirrHBV-120N  | Tissue | 6 - Established Cirrhosis | no  | N/A  | N/A   | N/A           | TCGA-DD-AA3K-01 | Tissue | 6 - Established Cirrhosis | yes | N/A  | 5       | N/A           |
| CirrHBV-208   | Tissue | 6 - Established Cirrhosis | no  | N/A  | N/A   | N/A           | TCGA-DD-AA3L-01 | Tissue | NA                        | yes | N/A  | 1368    | N/A           |
| CirrHBV-456   | Tissue | 6 - Established Cirrhosis | no  | N/A  | N/A   | N/A           | TCGA-DD-AA3M-01 | Tissue | 3.4 - Fibrous Speta       | yes | N/A  | 2       | N/A           |
| CirrHBV-5     | Tissue | 6 - Established Cirrhosis | no  | N/A  | N/A   | N/A           | TCGA-DD-AA3N-01 | Tissue | NA                        | yes | N/A  | 699     | N/A           |
| CirrHBV-532N  | Tissue | 6 - Established Cirrhosis | no  | N/A  | N/A   | N/A           | TCGA-DD-AA3O-01 | Tissue | 6 - Established Cirrhosis | yes | N/A  | 5       | N/A           |
| CirrHBV-542N  | Tissue | 6 - Established Cirrhosis | no  | N/A  | N/A   | N/A           | TCGA-DD-AA3P-01 | Tissue | NA                        | yes | N/A  | 227     | N/A           |
| CirrHCV-103   | Tissue | 6 - Established Cirrhosis | no  | N/A  | N/A   | N/A           | TCGA-DD-AA3Q-01 | Tissue | NA                        | yes | N/A  | 7       | N/A           |
| CirrHCV-105   | Tissue | 6 - Established Cirrhosis | no  | N/A  | N/A   | N/A           | TCGA-DD-AA3R-01 | Tissue | NA                        | yes | N/A  | 1       | N/A           |
| CirrHCV-130   | Tissue | 6 - Established Cirrhosis | no  | N/A  | N/A   | N/A           | TCGA-DD-AA3S-01 | Tissue | NA                        | yes | N/A  | 4       | N/A           |
| CirrHCV-153   | Tissue | 6 - Established Cirrhosis | no  | N/A  | N/A   | N/A           | TCGA-DD-AA3T-01 | Tissue | NA                        | yes | N/A  | 22      | N/A           |
| CirrHCV-156   | Tissue | 6 - Established Cirrhosis | no  | N/A  | N/A   | N/A           | TCGA-DD-AA3V-01 | Tissue | NA                        | yes | N/A  | 9       | N/A           |

|                 |        |                           |     |     |       |     |                 |        |                           |     |     |        |     |
|-----------------|--------|---------------------------|-----|-----|-------|-----|-----------------|--------|---------------------------|-----|-----|--------|-----|
| CirrHCV-161     | Tissue | 6 - Established Cirrhosis | no  | N/A | N/A   | N/A | TCGA-DD-AACW-01 | Tissue | NA                        | yes | N/A | 1726   | N/A |
| CirrHCV-164     | Tissue | 6 - Established Cirrhosis | no  | N/A | N/A   | N/A | TCGA-DD-AACX-01 | Tissue | 3.4 - Fibrous Speta       | yes | N/A | 3      | N/A |
| CirrHCV-174     | Tissue | 6 - Established Cirrhosis | no  | N/A | N/A   | N/A | TCGA-DD-AACY-01 | Tissue | 3.4 - Fibrous Speta       | yes | N/A | 290    | N/A |
| CirrHCV-176     | Tissue | 6 - Established Cirrhosis | no  | N/A | N/A   | N/A | TCGA-DD-AACZ-01 | Tissue | NA                        | yes | N/A | 25     | N/A |
| CirrHCV-179     | Tissue | 6 - Established Cirrhosis | no  | N/A | N/A   | N/A | TCGA-DD-AAD0-01 | Tissue | NA                        | yes | N/A | 4      | N/A |
| CirrHCV-200     | Tissue | 6 - Established Cirrhosis | no  | N/A | N/A   | N/A | TCGA-DD-AAD1-01 | Tissue | NA                        | yes | N/A | 451    | N/A |
| CirrHCV-202     | Tissue | 6 - Established Cirrhosis | no  | N/A | N/A   | N/A | TCGA-DD-AAD2-01 | Tissue | 1.2 - Portal Fibrosis     | yes | N/A | 25     | N/A |
| CirrHCV-216     | Tissue | 6 - Established Cirrhosis | no  | N/A | N/A   | N/A | TCGA-DD-AAD3-01 | Tissue | 1.2 - Portal Fibrosis     | yes | N/A | NA     | N/A |
| CirrHCV-227     | Tissue | 6 - Established Cirrhosis | no  | N/A | N/A   | N/A | TCGA-DD-AAD5-01 | Tissue | 3.4 - Fibrous Speta       | yes | N/A | 73     | N/A |
| CirrHCV-238     | Tissue | 6 - Established Cirrhosis | no  | N/A | N/A   | N/A | TCGA-DD-AAD6-01 | Tissue | NA                        | yes | N/A | NA     | N/A |
| CirrHCV-239     | Tissue | 6 - Established Cirrhosis | no  | N/A | N/A   | N/A | TCGA-DD-AAD8-01 | Tissue | 1.2 - Portal Fibrosis     | yes | N/A | 4      | N/A |
| CirrHCV-243     | Tissue | 6 - Established Cirrhosis | no  | N/A | N/A   | N/A | TCGA-DD-AADA-01 | Tissue | NA                        | yes | N/A | 8698   | N/A |
| CirrHCV-258N    | Tissue | 6 - Established Cirrhosis | no  | N/A | N/A   | N/A | TCGA-DD-AADB-01 | Tissue | NA                        | yes | N/A | 419    | N/A |
| CirrHCV-259N    | Tissue | 6 - Established Cirrhosis | no  | N/A | N/A   | N/A | TCGA-DD-AADC-01 | Tissue | NA                        | yes | N/A | 36     | N/A |
| CirrHCV-318N    | Tissue | 6 - Established Cirrhosis | no  | N/A | N/A   | N/A | TCGA-DD-AADD-01 | Tissue | NA                        | yes | N/A | 9804   | N/A |
| CirrHCV-390N    | Tissue | 6 - Established Cirrhosis | no  | N/A | N/A   | N/A | TCGA-DD-AADE-01 | Tissue | 3.4 - Fibrous Speta       | yes | N/A | 7      | N/A |
| CirrHCV-40N     | Tissue | 6 - Established Cirrhosis | no  | N/A | N/A   | N/A | TCGA-DD-AADF-01 | Tissue | NA                        | yes | N/A | 725    | N/A |
| CirrHCV-411N    | Tissue | 6 - Established Cirrhosis | no  | N/A | N/A   | N/A | TCGA-DD-AADG-01 | Tissue | 3.4 - Fibrous Speta       | yes | N/A | 2256   | N/A |
| CirrHCV-451     | Tissue | 6 - Established Cirrhosis | no  | N/A | N/A   | N/A | TCGA-DD-AADI-01 | Tissue | NA                        | yes | N/A | 27     | N/A |
| CirrHCV-452     | Tissue | 6 - Established Cirrhosis | no  | N/A | N/A   | N/A | TCGA-DD-AADJ-01 | Tissue | NA                        | yes | N/A | 708    | N/A |
| CirrHCV-459     | Tissue | 6 - Established Cirrhosis | no  | N/A | N/A   | N/A | TCGA-DD-AADK-01 | Tissue | 6 - Established Cirrhosis | yes | N/A | 236    | N/A |
| CirrHCV-465     | Tissue | 6 - Established Cirrhosis | no  | N/A | N/A   | N/A | TCGA-DD-AADL-01 | Tissue | NA                        | yes | N/A | 14     | N/A |
| CirrHCV-473     | Tissue | 6 - Established Cirrhosis | no  | N/A | N/A   | N/A | TCGA-DD-AADM-01 | Tissue | NA                        | yes | N/A | 112    | N/A |
| CirrHCV-516N    | Tissue | 6 - Established Cirrhosis | no  | N/A | N/A   | N/A | TCGA-DD-AADN-01 | Tissue | NA                        | yes | N/A | 151367 | N/A |
| CirrHCV-525     | Tissue | 6 - Established Cirrhosis | no  | N/A | N/A   | N/A | TCGA-DD-AADO-01 | Tissue | NA                        | yes | N/A | 176037 | N/A |
| CirrHCV-530     | Tissue | 6 - Established Cirrhosis | no  | N/A | N/A   | N/A | TCGA-DD-AADP-01 | Tissue | NA                        | yes | N/A | 9      | N/A |
| CirrHCV-56      | Tissue | 6 - Established Cirrhosis | no  | N/A | N/A   | N/A | TCGA-DD-AADQ-01 | Tissue | NA                        | yes | N/A | 7      | N/A |
| CirrHCV-6       | Tissue | 6 - Established Cirrhosis | no  | N/A | N/A   | N/A | TCGA-DD-AADR-01 | Tissue | 6 - Established Cirrhosis | yes | N/A | 3      | N/A |
| CirrHCV-617N    | Tissue | 6 - Established Cirrhosis | no  | N/A | N/A   | N/A | TCGA-DD-AADS-01 | Tissue | NA                        | yes | N/A | 11     | N/A |
| CirrHCV-621N    | Tissue | 6 - Established Cirrhosis | no  | N/A | N/A   | N/A | TCGA-DD-AADU-01 | Tissue | 3.4 - Fibrous Speta       | yes | N/A | 52     | N/A |
| CirrHCV-661N    | Tissue | 6 - Established Cirrhosis | no  | N/A | N/A   | N/A | TCGA-DD-AADV-01 | Tissue | 6 - Established Cirrhosis | yes | N/A | 11     | N/A |
| CirrHCV-673N    | Tissue | 6 - Established Cirrhosis | no  | N/A | N/A   | N/A | TCGA-DD-AADW-01 | Tissue | 6 - Established Cirrhosis | yes | N/A | 250    | N/A |
| CirrHCV-693N    | Tissue | 6 - Established Cirrhosis | no  | N/A | N/A   | N/A | TCGA-DD-AADY-01 | Tissue | 6 - Established Cirrhosis | yes | N/A | 9      | N/A |
| CirrHCV-7       | Tissue | 6 - Established Cirrhosis | no  | N/A | N/A   | N/A | TCGA-DD-AAE0-01 | Tissue | 3.4 - Fibrous Speta       | yes | N/A | 8751   | N/A |
| Hbil-397T       | Tissue | 6 - Established Cirrhosis | yes | N/A | N/A   | N/A | TCGA-DD-AAE1-01 | Tissue | 6 - Established Cirrhosis | yes | N/A | 2693   | N/A |
| Hbil-552T       | Tissue | 6 - Established Cirrhosis | yes | N/A | N/A   | N/A | TCGA-DD-AAE2-01 | Tissue | 6 - Established Cirrhosis | yes | N/A | 41     | N/A |
| HC-159          | Tissue | 6 - Established Cirrhosis | yes | N/A | N/A   | N/A | TCGA-DD-AAE3-01 | Tissue | 1.2 - Portal Fibrosis     | yes | N/A | 2      | N/A |
| HC-281T         | Tissue | 6 - Established Cirrhosis | yes | N/A | N/A   | N/A | TCGA-DD-AAE4-01 | Tissue | 6 - Established Cirrhosis | yes | N/A | 7      | N/A |
| HC-419T         | Tissue | 6 - Established Cirrhosis | yes | N/A | N/A   | N/A | TCGA-DD-AAE6-01 | Tissue | 6 - Established Cirrhosis | yes | N/A | 113    | N/A |
| HC-522T         | Tissue | 6 - Established Cirrhosis | yes | N/A | N/A   | N/A | TCGA-DD-AAE7-01 | Tissue | 3.4 - Fibrous Speta       | yes | N/A | 1      | N/A |
| HC-527T         | Tissue | 6 - Established Cirrhosis | yes | N/A | N/A   | N/A | TCGA-DD-AAE8-01 | Tissue | 6 - Established Cirrhosis | yes | N/A | 3      | N/A |
| HCCEIOH-110T    | Tissue | 6 - Established Cirrhosis | yes | N/A | N/A   | N/A | TCGA-DD-AAE9-01 | Tissue | 1.2 - Portal Fibrosis     | yes | N/A | 3      | N/A |
| HCCEIOH-157     | Tissue | 6 - Established Cirrhosis | yes | N/A | N/A   | N/A | TCGA-DD-AAEA-01 | Tissue | 1.2 - Portal Fibrosis     | yes | N/A | 2      | N/A |
| HCCEIOH-294T    | Tissue | 6 - Established Cirrhosis | yes | N/A | N/A   | N/A | TCGA-DD-AAEB-01 | Tissue | NA                        | yes | N/A | 1      | N/A |
| HCCEIOH-322T    | Tissue | 6 - Established Cirrhosis | yes | N/A | N/A   | N/A | TCGA-DD-AAED-01 | Tissue | 1.2 - Portal Fibrosis     | yes | N/A | 2405   | N/A |
| HCCEIOH-36      | Tissue | 6 - Established Cirrhosis | yes | N/A | N/A   | N/A | TCGA-DD-AAEE-01 | Tissue | 6 - Established Cirrhosis | yes | N/A | 3      | N/A |
| HCCEIOH-415T    | Tissue | 6 - Established Cirrhosis | yes | N/A | N/A   | N/A | TCGA-DD-AAEG-01 | Tissue | 6 - Established Cirrhosis | yes | N/A | 1      | N/A |
| HCCEIOH-444T    | Tissue | 6 - Established Cirrhosis | yes | N/A | N/A   | N/A | TCGA-DD-AAEH-01 | Tissue | 1.2 - Portal Fibrosis     | yes | N/A | NA     | N/A |
| HCCEIOH-466T    | Tissue | 6 - Established Cirrhosis | yes | N/A | N/A   | N/A | TCGA-DD-AAEJ-01 | Tissue | 6 - Established Cirrhosis | yes | N/A | 24     | N/A |
| HCCEIOH-515T    | Tissue | 6 - Established Cirrhosis | yes | N/A | N/A   | N/A | TCGA-DD-AAEK-01 | Tissue | 6 - Established Cirrhosis | yes | N/A | 5166   | N/A |
| HCCEIOH-562T    | Tissue | 6 - Established Cirrhosis | yes | N/A | N/A   | N/A | TCGA-DD-AAEP-01 | Tissue | 6 - Established Cirrhosis | yes | N/A | 2      | N/A |
| HCCEIOH-576T    | Tissue | 6 - Established Cirrhosis | yes | N/A | N/A   | N/A | TCGA-DD-AAVQ-01 | Tissue | 6 - Established Cirrhosis | yes | N/A | 1456   | N/A |
| HCCEIOH-59T     | Tissue | 6 - Established Cirrhosis | yes | N/A | N/A   | N/A | TCGA-DD-AAVR-01 | Tissue | 6 - Established Cirrhosis | yes | N/A | 36     | N/A |
| HCCEIOH-608T    | Tissue | 6 - Established Cirrhosis | yes | N/A | N/A   | N/A | TCGA-DD-AAVS-01 | Tissue | 3.4 - Fibrous Speta       | yes | N/A | 50149  | N/A |
| HCCEIOH-649T    | Tissue | 6 - Established Cirrhosis | yes | N/A | N/A   | N/A | TCGA-DD-AAVU-01 | Tissue | 3.4 - Fibrous Speta       | yes | N/A | 2      | N/A |
| HCCEIOH-665T    | Tissue | 6 - Established Cirrhosis | yes | N/A | N/A   | N/A | TCGA-DD-AAVW-01 | Tissue | 3.4 - Fibrous Speta       | yes | N/A | 7      | N/A |
| HCCEIOH-674T    | Tissue | 6 - Established Cirrhosis | yes | N/A | N/A   | N/A | TCGA-DD-AAVX-01 | Tissue | 6 - Established Cirrhosis | yes | N/A | 927    | N/A |
| HCCHCV-258T     | Tissue | 6 - Established Cirrhosis | yes | N/A | N/A   | N/A | TCGA-DD-AAVY-01 | Tissue | 0 - No Fibrosis           | yes | N/A | 11     | N/A |
| HCCHCV-259T     | Tissue | 6 - Established Cirrhosis | yes | N/A | N/A   | N/A | TCGA-DD-AAVZ-01 | Tissue | 6 - Established Cirrhosis | yes | N/A | 945    | N/A |
| HCCHCV-318T     | Tissue | 6 - Established Cirrhosis | yes | N/A | N/A   | N/A | TCGA-DD-AAW0-01 | Tissue | 3.4 - Fibrous Speta       | yes | N/A | 3      | N/A |
| HCCHCV-390T     | Tissue | 6 - Established Cirrhosis | yes | N/A | N/A   | N/A | TCGA-DD-AAW1-01 | Tissue | 6 - Established Cirrhosis | yes | N/A | 4      | N/A |
| HCCHCV-40T      | Tissue | 6 - Established Cirrhosis | yes | N/A | N/A   | N/A | TCGA-DD-AAW2-01 | Tissue | 6 - Established Cirrhosis | yes | N/A | 3      | N/A |
| HCCHCV-411T     | Tissue | 6 - Established Cirrhosis | yes | N/A | N/A   | N/A | TCGA-DD-AAW3-01 | Tissue | 0 - No Fibrosis           | yes | N/A | 3      | N/A |
| HCCHCV-516T     | Tissue | 6 - Established Cirrhosis | yes | N/A | N/A   | N/A | TCGA-ED-A459-01 | Tissue | NA                        | yes | N/A | 267    | N/A |
| HCCHCV-617T     | Tissue | 6 - Established Cirrhosis | yes | N/A | N/A   | N/A | TCGA-ED-A4X1-01 | Tissue | NA                        | yes | N/A | 573    | N/A |
| HCCHCV-621T     | Tissue | 6 - Established Cirrhosis | yes | N/A | N/A   | N/A | TCGA-ED-A5K9-01 | Tissue | NA                        | yes | N/A | 3177   | N/A |
| HCCHCV-661T     | Tissue | 6 - Established Cirrhosis | yes | N/A | N/A   | N/A | TCGA-ED-A627-01 | Tissue | NA                        | yes | N/A | NA     | N/A |
| HCCHCV-673T     | Tissue | 6 - Established Cirrhosis | yes | N/A | N/A   | N/A | TCGA-ED-A66X-01 | Tissue | NA                        | yes | N/A | 5840   | N/A |
| HCCHCV-693T     | Tissue | 6 - Established Cirrhosis | yes | N/A | N/A   | N/A | TCGA-ED-A66Y-01 | Tissue | NA                        | yes | N/A | 12100  | N/A |
| HG-230T         | Tissue | 6 - Established Cirrhosis | yes | N/A | N/A   | N/A | TCGA-ED-A7PX-01 | Tissue | NA                        | yes | N/A | 24     | N/A |
| HG-563T         | Tissue | 6 - Established Cirrhosis | yes | N/A | N/A   | N/A | TCGA-ED-A7PY-01 | Tissue | NA                        | yes | N/A | 2      | N/A |
| HM-134T         | Tissue | 6 - Established Cirrhosis | yes | N/A | N/A   | N/A | TCGA-ED-A7PZ-01 | Tissue | NA                        | yes | N/A | 2      | N/A |
| HM-212T         | Tissue | 6 - Established Cirrhosis | yes | N/A | N/A   | N/A | TCGA-ED-A7X0-01 | Tissue | NA                        | yes | N/A | 4      | N/A |
| HM-291T         | Tissue | 6 - Established Cirrhosis | yes | N/A | N/A   | N/A | TCGA-ED-A7XP-01 | Tissue | NA                        | yes | N/A | 18     | N/A |
| HM-300T         | Tissue | 6 - Established Cirrhosis | yes | N/A | N/A   | N/A | TCGA-ED-A82E-01 | Tissue | NA                        | yes | N/A | 4      | N/A |
| HM-417T         | Tissue | 6 - Established Cirrhosis | yes | N/A | N/A   | N/A | TCGA-ED-A805-01 | Tissue | NA                        | yes | N/A | 498    | N/A |
| HM-520T         | Tissue | 6 - Established Cirrhosis | yes | N/A | N/A   | N/A | TCGA-ED-A806-01 | Tissue | NA                        | yes | N/A | 3000   | N/A |
| HM-539T         | Tissue | 6 - Established Cirrhosis | yes | N/A | N/A   | N/A | TCGA-ED-A97K-01 | Tissue | NA                        | yes | N/A | 3      | N/A |
| HM-540T         | Tissue | 6 - Established Cirrhosis | yes | N/A | N/A   | N/A | TCGA-EP-A12J-01 | Tissue | NA                        | yes | N/A | NA     | N/A |
| TCGA-2Y-A95S-01 | Tissue | 6 - Established Cirrhosis | yes | N/A | 10793 | N/A | TCGA-EP-A12J-11 | Tissue | NA                        | no  | N/A | NA     | N/A |
| TCGA-2Y-A9GS-01 | Tissue | NA                        | yes | N/A | 74    | N/A | TCGA-EP-A26S-01 | Tissue | 0 - No Fibrosis           | yes | N/A | NA     | N/A |
| TCGA-2Y-A9GT-01 | Tissue | NA                        | yes | N/A | 17    | N/A | TCGA-EP-A26S-11 | Tissue | 0 - No Fibrosis           | no  | N/A | NA     | N/A |
| TCGA-2Y-A9GU-01 | Tissue | NA                        | yes | N/A | 304   | N/A | TCGA-EP-A2KA-01 | Tissue | 1.2 - Portal Fibrosis     | yes | N/A | 13     | N/A |
| TCGA-2Y-A9SV-01 | Tissue | NA                        | yes | N/A | 6     | N/A | TCGA-EP-A2KB-01 | Tissue | NA                        | yes | N/A | 2128   | N/A |
| TCGA-2Y-A9GW-01 | Tissue | NA                        | yes | N/A | 2     | N/A | TCGA-EP-A2KC-01 | Tissue | NA                        | yes | N/A | 43     | N/A |
| TCGA-2Y-A9GX-01 | Tissue | NA                        | yes | N/A | 1     | N/A | TCGA-EP-A3JL-01 | Tissue | NA                        | yes | N/A | 13     | N/A |
| TCGA-2Y-A9GY-01 | Tissue | NA                        | yes | N/A | 27600 | N/A | TCGA-EP-A3RK-01 | Tissue | 1.2 - Portal Fibrosis     | yes | N/A | 7      | N/A |
| TCGA-2Y-A9GZ-01 | Tissue | NA                        | yes | N/A | 7     | N/A | TCGA-ES-A2HS-01 | Tissue | 0 - No Fibrosis           | yes | N/A | 1      | N/A |
| TCGA-2Y-A9HO-01 | Tissue | NA                        | yes | N/A | 7598  | N/A |                 |        |                           |     |     |        |     |



|                 |        |                                                |     |     |        |     |                 |        |                           |     |     |        |     |
|-----------------|--------|------------------------------------------------|-----|-----|--------|-----|-----------------|--------|---------------------------|-----|-----|--------|-----|
| TCGA-2Y-A9H1-01 | Tissue | 1.2 - Portal Fibrosis                          | yes | N/A | 3      | N/A | TCGA-ES-A2HS-11 | Tissue | 0 - No Fibrosis           | no  | N/A | 1      | N/A |
| TCGA-2Y-A9H2-01 | Tissue | NA                                             | yes | N/A | 2      | N/A | TCGA-ES-A2HT-01 | Tissue | 0 - No Fibrosis           | yes | N/A | 4      | N/A |
| TCGA-2Y-A9H3-01 | Tissue | 1.2 - Portal Fibrosis                          | yes | N/A | 5640   | N/A | TCGA-ES-A2HT-11 | Tissue | 0 - No Fibrosis           | no  | N/A | 4      | N/A |
| TCGA-2Y-A9H4-01 | Tissue | NA                                             | yes | N/A | 11     | N/A | TCGA-FV-A23B-01 | Tissue | NA                        | yes | N/A | NA     | N/A |
| TCGA-2Y-A9H5-01 | Tissue | 1.2 - Portal Fibrosis                          | yes | N/A | 11700  | N/A | TCGA-FV-A23B-11 | Tissue | NA                        | no  | N/A | NA     | N/A |
| TCGA-2Y-A9H6-01 | Tissue | NA                                             | yes | N/A | 114    | N/A | TCGA-FV-A23Q-01 | Tissue | NA                        | yes | N/A | NA     | N/A |
| TCGA-2Y-A9H7-01 | Tissue | 3.4 - Fibrous Speta                            | yes | N/A | 6      | N/A | TCGA-FV-A23R-01 | Tissue | NA                        | yes | N/A | NA     | N/A |
| TCGA-2Y-A9H8-01 | Tissue | NA                                             | yes | N/A | 234000 | N/A | TCGA-FV-A23R-11 | Tissue | NA                        | no  | N/A | NA     | N/A |
| TCGA-2Y-A9H9-01 | Tissue | NA                                             | yes | N/A | 12     | N/A | TCGA-FV-A310-01 | Tissue | NA                        | yes | N/A | NA     | N/A |
| TCGA-2Y-A9HA-01 | Tissue | 3.4 - Fibrous Speta                            | yes | N/A | 114    | N/A | TCGA-FV-A311-01 | Tissue | 0 - No Fibrosis           | yes | N/A | NA     | N/A |
| TCGA-2Y-A9HB-01 | Tissue | NA                                             | yes | N/A | 21     | N/A | TCGA-FV-A3R2-01 | Tissue | NA                        | yes | N/A | NA     | N/A |
| TCGA-3K-AAZ8-01 | Tissue | 5 - Nodular Formation and Incomplete Cirrhosis | yes | N/A | NA     | N/A | TCGA-FV-A3R3-01 | Tissue | NA                        | yes | N/A | NA     | N/A |
| TCGA-4R-AA8I-01 | Tissue | 6 - Established Cirrhosis                      | yes | N/A | 5      | N/A | TCGA-FV-A495-01 | Tissue | 3.4 - Fibrous Speta       | yes | N/A | 39     | N/A |
| TCGA-5C-A9VG-01 | Tissue | NA                                             | yes | N/A | NA     | N/A | TCGA-FV-A496-01 | Tissue | 0 - No Fibrosis           | yes | N/A | 67     | N/A |
| TCGA-5C-A9VH-01 | Tissue | NA                                             | yes | N/A | NA     | N/A | TCGA-FV-A4ZP-01 | Tissue | NA                        | yes | N/A | 20326  | N/A |
| TCGA-5C-AAPD-01 | Tissue | NA                                             | yes | N/A | NA     | N/A | TCGA-FV-A4ZQ-01 | Tissue | NA                        | yes | N/A | NA     | N/A |
| TCGA-5R-AA1C-01 | Tissue | 1.2 - Portal Fibrosis                          | yes | N/A | 2      | N/A | TCGA-G3-A25S-01 | Tissue | 6 - Established Cirrhosis | yes | N/A | 281    | N/A |
| TCGA-5R-AA1D-01 | Tissue | 0 - No Fibrosis                                | yes | N/A | 5      | N/A | TCGA-G3-A25T-01 | Tissue | 0 - No Fibrosis           | yes | N/A | 7      | N/A |
| TCGA-5R-AAAM-01 | Tissue | 6 - Established Cirrhosis                      | yes | N/A | 32     | N/A | TCGA-G3-A25U-01 | Tissue | 0 - No Fibrosis           | yes | N/A | 10     | N/A |
| TCGA-BC-4072-01 | Tissue | NA                                             | yes | N/A | NA     | N/A | TCGA-G3-A25V-01 | Tissue | 6 - Established Cirrhosis | yes | N/A | 15     | N/A |
| TCGA-BC-4073-01 | Tissue | NA                                             | yes | N/A | NA     | N/A | TCGA-G3-A25W-01 | Tissue | 0 - No Fibrosis           | yes | N/A | 6      | N/A |
| TCGA-BC-A10Q-01 | Tissue | NA                                             | yes | N/A | NA     | N/A | TCGA-G3-A25W-11 | Tissue | 0 - No Fibrosis           | no  | N/A | 6      | N/A |
| TCGA-BC-A10Q-11 | Tissue | NA                                             | no  | N/A | NA     | N/A | TCGA-G3-A25X-01 | Tissue | 1.2 - Portal Fibrosis     | yes | N/A | 11     | N/A |
| TCGA-BC-A10R-01 | Tissue | NA                                             | yes | N/A | 27     | N/A | TCGA-G3-A25X-11 | Tissue | 1.2 - Portal Fibrosis     | no  | N/A | 11     | N/A |
| TCGA-BC-A10R-11 | Tissue | NA                                             | no  | N/A | 27     | N/A | TCGA-G3-A25Y-01 | Tissue | 3.4 - Fibrous Speta       | yes | N/A | 35     | N/A |
| TCGA-BC-A10S-01 | Tissue | NA                                             | yes | N/A | NA     | N/A | TCGA-DD-A1EC-01 | Tissue | 0 - No Fibrosis           | yes | N/A | 2      | N/A |
| TCGA-BC-A10S-11 | Tissue | NA                                             | no  | N/A | NA     | N/A | TCGA-G3-A3CQ-01 | Tissue | 6 - Established Cirrhosis | yes | N/A | 67     | N/A |
| TCGA-BC-A10T-01 | Tissue | 1.2 - Portal Fibrosis                          | yes | N/A | NA     | N/A | TCGA-G3-A3CH-01 | Tissue | 6 - Established Cirrhosis | yes | N/A | 41     | N/A |
| TCGA-BC-A10T-11 | Tissue | 1.2 - Portal Fibrosis                          | no  | N/A | NA     | N/A | TCGA-G3-A3CI-01 | Tissue | 0 - No Fibrosis           | yes | N/A | 2      | N/A |
| TCGA-BC-A10U-01 | Tissue | NA                                             | yes | N/A | 38     | N/A | TCGA-DD-A1EC-11 | Tissue | 0 - No Fibrosis           | no  | N/A | 2      | N/A |
| TCGA-BC-A10U-11 | Tissue | NA                                             | no  | N/A | 38     | N/A | TCGA-G3-A3CK-01 | Tissue | 6 - Established Cirrhosis | yes | N/A | 3      | N/A |
| TCGA-BC-A10W-01 | Tissue | NA                                             | yes | N/A | 79     | N/A | TCGA-G3-A5S1-01 | Tissue | 6 - Established Cirrhosis | yes | N/A | 9      | N/A |
| TCGA-BC-A10W-11 | Tissue | NA                                             | no  | N/A | 79     | N/A | TCGA-G3-A5S2-01 | Tissue | 6 - Established Cirrhosis | yes | N/A | 3      | N/A |
| TCGA-BC-A10X-01 | Tissue | NA                                             | yes | N/A | 264    | N/A | TCGA-G3-A5SK-01 | Tissue | 6 - Established Cirrhosis | yes | N/A | NA     | N/A |
| TCGA-BC-A10X-11 | Tissue | NA                                             | no  | N/A | 264    | N/A | TCGA-G3-A5SL-01 | Tissue | 0 - No Fibrosis           | yes | N/A | 4      | N/A |
| TCGA-BC-A10Y-01 | Tissue | NA                                             | yes | N/A | 10575  | N/A | TCGA-G3-A5SM-01 | Tissue | 6 - Established Cirrhosis | yes | N/A | 12     | N/A |
| TCGA-BC-A10Y-11 | Tissue | NA                                             | no  | N/A | 10575  | N/A | TCGA-G3-A6UC-01 | Tissue | 6 - Established Cirrhosis | yes | N/A | 4      | N/A |
| TCGA-BC-A10Z-01 | Tissue | NA                                             | yes | N/A | 779    | N/A | TCGA-G3-A7M5-01 | Tissue | 0 - No Fibrosis           | yes | N/A | 6      | N/A |
| TCGA-BC-A10Z-11 | Tissue | NA                                             | no  | N/A | 779    | N/A | TCGA-G3-A7M6-01 | Tissue | 1.2 - Portal Fibrosis     | yes | N/A | 24     | N/A |
| TCGA-BC-A110-01 | Tissue | NA                                             | yes | N/A | NA     | N/A | TCGA-G3-A7M7-01 | Tissue | 3.4 - Fibrous Speta       | yes | N/A | 4      | N/A |
| TCGA-BC-A110-11 | Tissue | NA                                             | no  | N/A | NA     | N/A | TCGA-G3-A7M8-01 | Tissue | 6 - Established Cirrhosis | yes | N/A | 5      | N/A |
| TCGA-BC-A112-01 | Tissue | 0 - No Fibrosis                                | yes | N/A | 233    | N/A | TCGA-G3-A7M9-01 | Tissue | 6 - Established Cirrhosis | yes | N/A | 22868  | N/A |
| TCGA-BC-A112-11 | Tissue | 0 - No Fibrosis                                | no  | N/A | 233    | N/A | TCGA-G3-AAU2-01 | Tissue | 1.2 - Portal Fibrosis     | yes | N/A | 3      | N/A |
| TCGA-BC-A216-01 | Tissue | 0 - No Fibrosis                                | yes | N/A | 831    | N/A | TCGA-G3-AAV0-01 | Tissue | 0 - No Fibrosis           | yes | N/A | 4      | N/A |
| TCGA-BC-A216-11 | Tissue | 0 - No Fibrosis                                | no  | N/A | 831    | N/A | TCGA-G3-AAV1-01 | Tissue | 6 - Established Cirrhosis | yes | N/A | 8      | N/A |
| TCGA-BC-A217-01 | Tissue | 0 - No Fibrosis                                | yes | N/A | 28     | N/A | TCGA-G3-AAV2-01 | Tissue | 6 - Established Cirrhosis | yes | N/A | 4      | N/A |
| TCGA-BC-A3KF-01 | Tissue | NA                                             | yes | N/A | NA     | N/A | TCGA-G3-AAV3-01 | Tissue | 6 - Established Cirrhosis | yes | N/A | 5      | N/A |
| TCGA-BC-A3KG-01 | Tissue | NA                                             | yes | N/A | 618    | N/A | TCGA-G3-AAV4-01 | Tissue | 3.4 - Fibrous Speta       | yes | N/A | 4      | N/A |
| TCGA-BC-A5W4-01 | Tissue | NA                                             | yes | N/A | NA     | N/A | TCGA-G3-AAV5-01 | Tissue | 6 - Established Cirrhosis | yes | N/A | NA     | N/A |
| TCGA-BC-A69H-01 | Tissue | NA                                             | yes | N/A | 103900 | N/A | TCGA-G3-AAV6-01 | Tissue | 0 - No Fibrosis           | yes | N/A | 57875  | N/A |
| TCGA-BC-A69I-01 | Tissue | NA                                             | yes | N/A | 2      | N/A | TCGA-DD-A1ED-01 | Tissue | 0 - No Fibrosis           | yes | N/A | 3      | N/A |
| TCGA-BC-A8YQ-01 | Tissue | NA                                             | yes | N/A | NA     | N/A | TCGA-GJ-A30U-01 | Tissue | NA                        | yes | N/A | 8      | N/A |
| TCGA-BD-A2L6-01 | Tissue | 3.4 - Fibrous Speta                            | yes | N/A | 53     | N/A | TCGA-GJ-A6C0-01 | Tissue | NA                        | yes | N/A | NA     | N/A |
| TCGA-BD-A2L6-11 | Tissue | 3.4 - Fibrous Speta                            | no  | N/A | 53     | N/A | TCGA-GJ-A9D8-01 | Tissue | NA                        | yes | N/A | NA     | N/A |
| TCGA-BD-A3EP-01 | Tissue | 1.2 - Portal Fibrosis                          | yes | N/A | 17     | N/A | TCGA-HP-A5M2-01 | Tissue | NA                        | yes | N/A | NA     | N/A |
| TCGA-BD-A3EP-11 | Tissue | 1.2 - Portal Fibrosis                          | no  | N/A | 17     | N/A | TCGA-HP-A5N0-01 | Tissue | 0 - No Fibrosis           | yes | N/A | NA     | N/A |
| TCGA-BD-A3ER-01 | Tissue | 6 - Established Cirrhosis                      | yes | N/A | 5      | N/A | TCGA-K7-A5RF-01 | Tissue | NA                        | yes | N/A | 5      | N/A |
| TCGA-BW-A5NO-01 | Tissue | 3.4 - Fibrous Speta                            | yes | N/A | NA     | N/A | TCGA-K7-A5RG-01 | Tissue | NA                        | yes | N/A | 19     | N/A |
| TCGA-BW-A5NP-01 | Tissue | 3.4 - Fibrous Speta                            | yes | N/A | 143684 | N/A | TCGA-K7-A6G5-01 | Tissue | NA                        | yes | N/A | NA     | N/A |
| TCGA-BW-A5NQ-01 | Tissue | 6 - Established Cirrhosis                      | yes | N/A | NA     | N/A | TCGA-K7-AAU7-01 | Tissue | NA                        | yes | N/A | 290    | N/A |
| TCGA-CC-5258-01 | Tissue | NA                                             | yes | N/A | NA     | N/A | TCGA-KR-A7K0-01 | Tissue | NA                        | yes | N/A | 11     | N/A |
| TCGA-CC-5259-01 | Tissue | NA                                             | yes | N/A | NA     | N/A | TCGA-KR-A7K2-01 | Tissue | NA                        | yes | N/A | 14     | N/A |
| TCGA-CC-5260-01 | Tissue | NA                                             | yes | N/A | NA     | N/A | TCGA-KR-A7K7-01 | Tissue | NA                        | yes | N/A | 308836 | N/A |
| TCGA-CC-5261-01 | Tissue | NA                                             | yes | N/A | NA     | N/A | TCGA-KR-A7K8-01 | Tissue | NA                        | yes | N/A | 154    | N/A |
| TCGA-CC-5262-01 | Tissue | NA                                             | yes | N/A | NA     | N/A | TCGA-LG-A6GG-01 | Tissue | NA                        | yes | N/A | NA     | N/A |
| TCGA-CC-5263-01 | Tissue | NA                                             | yes | N/A | NA     | N/A | TCGA-LG-A9QC-01 | Tissue | NA                        | yes | N/A | NA     | N/A |
| TCGA-CC-5264-01 | Tissue | NA                                             | yes | N/A | NA     | N/A | TCGA-LG-A9QD-01 | Tissue | NA                        | yes | N/A | NA     | N/A |
| TCGA-CC-A123-01 | Tissue | NA                                             | yes | N/A | NA     | N/A | TCGA-MI-A75C-01 | Tissue | NA                        | yes | N/A | 4      | N/A |
| TCGA-CC-A1HT-01 | Tissue | NA                                             | yes | N/A | NA     | N/A | TCGA-MI-A75E-01 | Tissue | 1.2 - Portal Fibrosis     | yes | N/A | 5      | N/A |
| TCGA-CC-A3M9-01 | Tissue | NA                                             | yes | N/A | NA     | N/A | TCGA-MI-A75G-01 | Tissue | 6 - Established Cirrhosis | yes | N/A | 6      | N/A |
| TCGA-CC-A3MA-01 | Tissue | NA                                             | yes | N/A | NA     | N/A | TCGA-MI-A75H-01 | Tissue | 6 - Established Cirrhosis | yes | N/A | 11     | N/A |
| TCGA-CC-A3MB-01 | Tissue | NA                                             | yes | N/A | NA     | N/A | TCGA-MI-A75I-01 | Tissue | NA                        | yes | N/A | NA     | N/A |
| TCGA-CC-A3MC-01 | Tissue | NA                                             | yes | N/A | NA     | N/A | TCGA-MR-A520-01 | Tissue | NA                        | yes | N/A | NA     | N/A |
| TCGA-CC-A5UC-01 | Tissue | NA                                             | yes | N/A | NA     | N/A | TCGA-MR-A8JO-01 | Tissue | NA                        | yes | N/A | 2      | N/A |
| TCGA-CC-A5UD-01 | Tissue | NA                                             | yes | N/A | NA     | N/A | TCGA-NI-A4U2-01 | Tissue | 1.2 - Portal Fibrosis     | yes | N/A | 5      | N/A |
| TCGA-CC-A5UE-01 | Tissue | NA                                             | yes | N/A | NA     | N/A | TCGA-NI-A8LF-01 | Tissue | NA                        | yes | N/A | NA     | N/A |
| TCGA-CC-A7IE-01 | Tissue | NA                                             | yes | N/A | NA     | N/A | TCGA-O8-A75V-01 | Tissue | 6 - Established Cirrhosis | yes | N/A | 7      | N/A |
| TCGA-CC-A7IF-01 | Tissue | NA                                             | yes | N/A | NA     | N/A | TCGA-PD-A5DF-01 | Tissue | NA                        | yes | N/A | NA     | N/A |
| TCGA-CC-A7IG-01 | Tissue | NA                                             | yes | N/A | NA     | N/A | TCGA-QA-A7B7-01 | Tissue | 0 - No Fibrosis           | yes | N/A | 1751   | N/A |
| TCGA-CC-A7IH-01 | Tissue | NA                                             | yes | N/A | NA     | N/A | TCGA-RC-A6M3-01 | Tissue | NA                        | yes | N/A | NA     | N/A |
| TCGA-CC-A7II-01 | Tissue | NA                                             | yes | N/A | NA     | N/A | TCGA-RC-A6M4-01 | Tissue | NA                        | yes | N/A | 5      | N/A |
| TCGA-CC-A7IJ-01 | Tissue | NA                                             | yes | N/A | NA     | N/A | TCGA-RC-A6M5-01 | Tissue | NA                        | yes | N/A | NA     | N/A |
| TCGA-CC-A7IK-01 | Tissue | NA                                             | yes | N/A | NA     | N/A | TCGA-RC-A6M6-01 | Tissue | NA                        | yes | N/A | 12986  | N/A |
| TCGA-CC-A7IL-01 | Tissue | NA                                             | yes | N/A | NA     | N/A | TCGA-RC-A7S9-01 | Tissue | 6 - Established Cirrhosis | yes | N/A | 10     | N/A |
| TCGA-CC-A8H5-01 | Tissue | NA                                             | yes | N/A | NA     | N/A | TCGA-RC-A7SB-01 | Tissue | 0 - No Fibrosis           | yes | N/A | 3      | N/A |
| TCGA-CC-A8HT-01 | Tissue | NA                                             | yes | N/A | NA     | N/A | TCGA-RC-A7SF-01 | Tissue | 3.4 - Fibrous Speta       | yes | N/A | 87     | N/A |
| TCGA-CC-A8HU-01 | Tissue | NA                                             | yes | N/A | NA     | N/A | TCGA-RC-A7SH-01 | Tissue | 3.4 - Fibrous Speta       | yes | N/A | 2466   | N/A |
| TCGA-CC-A8HV-01 | Tissue | NA                                             | yes | N/A | NA     | N/A | TCGA-RC-A7SK-01 | Tissue | 1.2 - Portal Fibrosis     | yes | N/A | 25     | N/A |
| TCGA-CC-A9FS-01 | Tissue | NA                                             | yes | N/A | NA     | N/A | TCGA-RG-A7D4-01 | Tissue | NA                        | yes | N/A | 5650   | N/A |

|                 |        |                                                |     |     |       |     |                 |        |                           |     |     |      |     |
|-----------------|--------|------------------------------------------------|-----|-----|-------|-----|-----------------|--------|---------------------------|-----|-----|------|-----|
| TCGA-CC-A9FU-01 | Tissue | NA                                             | yes | N/A | NA    | N/A | TCGA-T1-A6J8-01 | Tissue | NA                        | yes | N/A | NA   | N/A |
| TCGA-CC-A9FV-01 | Tissue | NA                                             | yes | N/A | NA    | N/A | TCGA-UB-A7MA-01 | Tissue | 0 - No Fibrosis           | yes | N/A | 2008 | N/A |
| TCGA-CC-A9FW-01 | Tissue | NA                                             | yes | N/A | NA    | N/A | TCGA-UB-A7MB-01 | Tissue | 0 - No Fibrosis           | yes | N/A | 1865 | N/A |
| TCGA-DD-A113-01 | Tissue | 0 - No Fibrosis                                | yes | N/A | 133   | N/A | TCGA-UB-A7MC-01 | Tissue | 1,2 - Portal Fibrosis     | yes | N/A | 126  | N/A |
| TCGA-DD-A113-11 | Tissue | 0 - No Fibrosis                                | no  | N/A | 133   | N/A | TCGA-UB-A7MD-01 | Tissue | 6 - Established Cirrhosis | yes | N/A | 23   | N/A |
| TCGA-DD-A114-01 | Tissue | 5 - Nodular Formation and Incomplete Cirrhosis | yes | N/A | 21    | N/A | TCGA-UB-A7ME-01 | Tissue | 1,2 - Portal Fibrosis     | yes | N/A | 1388 | N/A |
| TCGA-DD-A114-11 | Tissue | 5 - Nodular Formation and Incomplete Cirrhosis | no  | N/A | 21    | N/A | TCGA-UB-A7MF-01 | Tissue | 6 - Established Cirrhosis | yes | N/A | 2505 | N/A |
| TCGA-DD-A115-01 | Tissue | 0 - No Fibrosis                                | yes | N/A | 10    | N/A | TCGA-UB-AA0U-01 | Tissue | 0 - No Fibrosis           | yes | N/A | 26   | N/A |
| TCGA-DD-A115-11 | Tissue | 0 - No Fibrosis                                | no  | N/A | 10    | N/A | TCGA-UB-AA0V-01 | Tissue | 0 - No Fibrosis           | yes | N/A | 3    | N/A |
| TCGA-DD-A116-01 | Tissue | 3,4 - Fibrous Speta                            | yes | N/A | 24    | N/A | TCGA-WJ-A86L-01 | Tissue | 0 - No Fibrosis           | yes | N/A | 16   | N/A |
| TCGA-DD-A116-11 | Tissue | 3,4 - Fibrous Speta                            | no  | N/A | 24    | N/A | TCGA-WQ-A9G7-01 | Tissue | NA                        | yes | N/A | NA   | N/A |
| TCGA-DD-A118-01 | Tissue | 0 - No Fibrosis                                | yes | N/A | 85150 | N/A | TCGA-WQ-AB4B-01 | Tissue | NA                        | yes | N/A | 5    | N/A |
| TCGA-DD-A118-11 | Tissue | 0 - No Fibrosis                                | no  | N/A | 85150 | N/A | TCGA-WX-AA44-01 | Tissue | 6 - Established Cirrhosis | yes | N/A | 48   | N/A |
| TCGA-DD-A119-01 | Tissue | 0 - No Fibrosis                                | yes | N/A | 1836  | N/A | TCGA-WX-AA46-01 | Tissue | 0 - No Fibrosis           | yes | N/A | 1    | N/A |
| TCGA-DD-A119-11 | Tissue | 0 - No Fibrosis                                | no  | N/A | 1836  | N/A | TCGA-WX-AA47-01 | Tissue | 0 - No Fibrosis           | yes | N/A | 1    | N/A |
| TCGA-DD-A11A-01 | Tissue | 0 - No Fibrosis                                | yes | N/A | 223   | N/A | TCGA-XR-A8TC-01 | Tissue | 6 - Established Cirrhosis | yes | N/A | 47   | N/A |
| TCGA-DD-A11A-11 | Tissue | 0 - No Fibrosis                                | no  | N/A | 223   | N/A | TCGA-XR-A8TD-01 | Tissue | 0 - No Fibrosis           | yes | N/A | 188  | N/A |
| TCGA-DD-A11B-01 | Tissue | 6 - Established Cirrhosis                      | yes | N/A | 15    | N/A | TCGA-XR-A8TE-01 | Tissue | 0 - No Fibrosis           | yes | N/A | 809  | N/A |
| TCGA-DD-A11B-11 | Tissue | 6 - Established Cirrhosis                      | no  | N/A | 15    | N/A | TCGA-XR-A8TF-01 | Tissue | 3,4 - Fibrous Speta       | yes | N/A | 39   | N/A |
| TCGA-DD-A11C-01 | Tissue | 0 - No Fibrosis                                | yes | N/A | 11    | N/A | TCGA-XR-A8TG-01 | Tissue | 6 - Established Cirrhosis | yes | N/A | 1    | N/A |
| TCGA-DD-A11C-11 | Tissue | 0 - No Fibrosis                                | no  | N/A | 11    | N/A | TCGA-YA-A8S7-01 | Tissue | NA                        | yes | N/A | 56   | N/A |
| TCGA-DD-A11D-01 | Tissue | 6 - Established Cirrhosis                      | yes | N/A | 8     | N/A | TCGA-ZP-A9CV-01 | Tissue | NA                        | yes | N/A | 48   | N/A |
| TCGA-DD-A11D-11 | Tissue | 6 - Established Cirrhosis                      | no  | N/A | 8     | N/A | TCGA-ZP-A9CY-01 | Tissue | 6 - Established Cirrhosis | yes | N/A | NA   | N/A |
| TCGA-DD-A1E9-01 | Tissue | 6 - Established Cirrhosis                      | yes | N/A | 202   | N/A | TCGA-ZP-A9CZ-01 | Tissue | 3,4 - Fibrous Speta       | yes | N/A | 8    | N/A |
| TCGA-DD-A1E9-11 | Tissue | 6 - Established Cirrhosis                      | no  | N/A | 202   | N/A | TCGA-ZP-A9D0-01 | Tissue | 0 - No Fibrosis           | yes | N/A | NA   | N/A |
| TCGA-DD-A1EA-01 | Tissue | 1,2 - Portal Fibrosis                          | yes | N/A | 3     | N/A | TCGA-DD-A1ED-11 | Tissue | 0 - No Fibrosis           | no  | N/A | 3    | N/A |
| TCGA-ZP-A9D1-01 | Tissue | 5 - Nodular Formation and Incomplete Cirrhosis | yes | N/A | 8     | N/A | TCGA-ZP-A9D2-01 | Tissue | 1,2 - Portal Fibrosis     | yes | N/A | NA   | N/A |
| TCGA-ZS-A9CD-01 | Tissue | 5 - Nodular Formation and Incomplete Cirrhosis | yes | N/A | NA    | N/A | TCGA-ZP-A9D4-01 | Tissue | 0 - No Fibrosis           | yes | N/A | 2    | N/A |
| TCGA-G3-A25Z-01 | Tissue | 5 - Nodular Formation and Incomplete Cirrhosis | yes | N/A | 44    | N/A | TCGA-DD-A1EE-01 | Tissue | 6 - Established Cirrhosis | yes | N/A | 3    | N/A |
| TCGA-G3-A3CJ-01 | Tissue | 5 - Nodular Formation and Incomplete Cirrhosis | yes | N/A | 3     | N/A | TCGA-ZS-A9CE-01 | Tissue | 0 - No Fibrosis           | yes | N/A | NA   | N/A |
| TCGA-G3-AAV7-01 | Tissue | 5 - Nodular Formation and Incomplete Cirrhosis | yes | N/A | 3     | N/A | TCGA-ZS-A9CF-01 | Tissue | 0 - No Fibrosis           | yes | N/A | NA   | N/A |
| TCGA-DD-A4NA-01 | Tissue | 5 - Nodular Formation and Incomplete Cirrhosis | yes | N/A | 3     | N/A | TCGA-ZS-A9CF-02 | Tissue | 0 - No Fibrosis           | yes | N/A | NA   | N/A |
| TCGA-DD-A4CI-01 | Tissue | 5 - Nodular Formation and Incomplete Cirrhosis | yes | N/A | 1     | N/A | TCGA-ZS-A9CG-01 | Tissue | 0 - No Fibrosis           | yes | N/A | NA   | N/A |

**Table S2 : Clinical information for cfDNA samples used in bisulfite pyrosequencing.**

| <b>Sample_ID</b> | <b>Cirrhosis</b> | <b>HCC</b> | <b>MELD</b> | <b>AFP</b> |
|------------------|------------------|------------|-------------|------------|
| 20535            | Yes              | No         | 18          | 3          |
| 20563            | Yes              | No         | 30          | 1.9        |
| 20600            | Yes              | No         | 8           | 3.4        |
| 20646            | Yes              | No         | 14          | 5.7        |
| 20736            | Yes              | No         | 11          | 5.1        |
| 20739            | Yes              | No         | 10          | 1.2        |
| 20775            | Yes              | No         | 6           | 6.5        |
| 20864            | Yes              | No         | 11          | 7.6        |
| 20918            | Yes              | No         | 15          | 2          |
| 20987            | Yes              | No         | 17          | 2.5        |
| 20361            | Yes              | Yes        | 11          | 102        |
| 20642            | Yes              | Yes        | 7           | 3.1        |
| 19910            | Yes              | Yes        | 10          | 36         |
| 19657            | Yes              | Yes        | 8           | 6          |
| 19249            | Yes              | Yes        | 9           | 6.2        |
| 18298            | Yes              | Yes        | 12          | 82258      |
| 19784            | Yes              | Yes        | 11          | 186        |
| 19888            | Yes              | Yes        | 17          | 2.6        |
| 20738            | Yes              | Yes        | 23          | 3          |
| 21440            | Yes              | Yes        | 10          | 3.5        |
| HBC-011          | yes              | yes        | 7           | 2.1        |
| HBC-010          | yes              | yes        | 6           | 8.5        |
| HBC-013          | yes              | yes        | 10          | 11.7       |
| HBC-021          | yes              | yes        | 8           | 5.6        |
| HBC-008          | yes              | yes        | 28          | 4.4        |
| HBC-086          | yes              | yes        | 8           | 18.8       |
| HBC-012          | yes              | yes        | 10          | 1019.1     |
| HBC-018          | yes              | yes        | 28          | 2.5        |
| HBC-036          | yes              | yes        | 14          | 2.9        |
| HBC-007          | yes              | yes        | 10          | 7.7        |
| HBC-1338         | yes              | no         | 19          | 2.7        |
| HBC-1062         | yes              | no         | 11          | 4.4        |
| HBC-1005         | yes              | no         | 14          | 2.2        |
| HBC-1073         | yes              | no         | 11          | 5          |
| HBC-1023         | yes              | no         | 9           | 2.4        |
| HBC-1342         | yes              | no         | 10          | 2.3        |
| HBC-1334         | yes              | no         | 11          | 4.4        |
| HBC-1115         | yes              | no         | 11          | 5.3        |
| HBC-1054         | yes              | no         | 10          | 3.3        |
| HBC-1036         | yes              | no         | 9           | 5.9        |

**Table S3: Primers used in this study for bisulfite pyrosequencing.**

|                 |                                    |
|-----------------|------------------------------------|
| cg07610777-F    | TTGGGGTAAGAAAATAGTTGTATGG          |
| cg07610777-Rbio | /5biosg/ACCTCAATATCCCCTAAATAAA     |
| cg07610777-seq  | TATAAAGTTTATTTGAGGGAAAAGAA         |
| cg13781744-F    | AAGAGTTAGGGTGGGAGTGAGAG            |
| cg13781744-Rbio | /5biosg/CACCTAAAAACTCACCCCTAAAAACA |
| cg13781744-seq  | TTAGGGTTGGTTTTTTTTAT               |
| cg04645914-F    | AGTGATTGAGGTGTTTTGAA               |
| cg04645914-Rbio | AAAAACCCGAAAAAACTATTACCAC          |
| cg04645914-seq  | GGTGTGTTTCAAATTAATTTATTGTT         |
| cg18054281-F    | GAGTTGTAAAGGATTTATGTTTTTT          |
| cg18054281-Rbio | /5biosg/CATATAAACCTATATACCAAATCTCC |
| cg18054281-seq  | AAGTATTTGTAAGAGTTTTAAG             |
| cg25026480-F    | GGGTTTTTTCGGTTATAGTTTTTTTT         |
| cg25026480-Rbio | /5biosg/TAACAACCCGAATAAATCACAAACT  |
| cg25026480-seq  | GGGTTTGTGTTGTTTTTTTTG              |

**Table S4: Hypermethylated CpGs used for Lasso regression analysis.**

|            |            |            |            |            |            |            |            |
|------------|------------|------------|------------|------------|------------|------------|------------|
| cg00145955 | cg03304019 | cg06192883 | cg08805054 | cg13673023 | cg16899036 | cg20071427 | cg24437859 |
| cg00233028 | cg03354717 | cg06202802 | cg09050331 | cg13735469 | cg17143376 | cg20073313 | cg24528164 |
| cg00255919 | cg03368099 | cg06204126 | cg09082487 | cg13781744 | cg17153082 | cg20337103 | cg24564492 |
| cg00298977 | cg03435448 | cg06215569 | cg09183450 | cg13818451 | cg17179862 | cg20356637 | cg24642468 |
| cg00337187 | cg03455424 | cg06223172 | cg09234936 | cg13900817 | cg17200137 | cg20426959 | cg24696332 |
| cg00347757 | cg03473127 | cg06343169 | cg09248054 | cg13954457 | cg17319294 | cg20570109 | cg24711774 |
| cg00376654 | cg03589820 | cg06351481 | cg09259772 | cg14042308 | cg17417856 | cg20600729 | cg24718722 |
| cg00392156 | cg03651292 | cg06416034 | cg09308553 | cg14058329 | cg17450621 | cg20985399 | cg24768135 |
| cg00414835 | cg03706056 | cg06478886 | cg09327855 | cg14066993 | cg17453456 | cg21144063 | cg24818238 |
| cg00423675 | cg03739573 | cg06488443 | cg09827751 | cg14093255 | cg17478893 | cg21209395 | cg24834889 |
| cg00524708 | cg03803541 | cg06496484 | cg09862733 | cg14095959 | cg17569124 | cg21209859 | cg25019989 |
| cg00607058 | cg03803861 | cg06578342 | cg09916840 | cg14114910 | cg17704343 | cg21287054 | cg25035485 |
| cg00782355 | cg03917138 | cg06638795 | cg09973676 | cg14361804 | cg17713488 | cg21334510 | cg25299214 |
| cg00795812 | cg03922251 | cg06687640 | cg10052687 | cg14421582 | cg17735531 | cg21366673 | cg25468005 |
| cg00836482 | cg03928874 | cg06834661 | cg10143146 | cg14442890 | cg17822325 | cg21415530 | cg25468618 |
| cg00926420 | cg04003990 | cg06853416 | cg10258719 | cg14459158 | cg17847520 | cg21540359 | cg25599129 |
| cg00980581 | cg04024827 | cg06874426 | cg10287485 | cg14541011 | cg18014109 | cg21548955 | cg25618731 |
| cg00983520 | cg04090468 | cg06974930 | cg10380221 | cg14601038 | cg18032014 | cg21559386 | cg25651476 |
| cg00986350 | cg04117972 | cg07026448 | cg10553748 | cg14612417 | cg18059012 | cg21577836 | cg25924688 |
| cg01076129 | cg04175111 | cg07028396 | cg10709021 | cg14736365 | cg18305365 | cg21751145 | cg26035892 |
| cg01138706 | cg04193820 | cg07028768 | cg10722410 | cg14740554 | cg18358723 | cg21785034 | cg26152754 |
| cg01211283 | cg04255230 | cg07100700 | cg10750464 | cg14899046 | cg18428234 | cg21811284 | cg26224785 |
| cg01223400 | cg04359418 | cg07192048 | cg10841673 | cg14988722 | cg18437808 | cg21877680 | cg26385126 |
| cg01278041 | cg04459086 | cg07248377 | cg11003309 | cg15006627 | cg18442187 | cg21885361 | cg26445985 |
| cg01290755 | cg04509559 | cg07292311 | cg11003725 | cg15044767 | cg18464402 | cg21908235 | cg26514578 |
| cg01403532 | cg04574034 | cg07388493 | cg11045746 | cg15054274 | cg18477429 | cg21920469 | cg26526883 |
| cg01489256 | cg04610274 | cg07389611 | cg11113753 | cg15243034 | cg18486590 | cg21937660 | cg26597838 |
| cg01578057 | cg04612030 | cg07390210 | cg11168433 | cg15498409 | cg18489675 | cg22126965 | cg26606589 |
| cg01773927 | cg04645914 | cg07402062 | cg11205312 | cg15505700 | cg18512515 | cg22151446 | cg26609120 |
| cg01802772 | cg04687439 | cg07407736 | cg11320910 | cg15555527 | cg18628367 | cg22175873 | cg26643967 |
| cg01810575 | cg04755771 | cg07471943 | cg11418303 | cg15734230 | cg18850089 | cg22532774 | cg26673980 |
| cg01946191 | cg04767897 | cg07479615 | cg11521079 | cg15776494 | cg18864882 | cg22542803 | cg26676440 |
| cg01971227 | cg04771946 | cg07485775 | cg11631063 | cg15816012 | cg18919684 | cg22632756 | cg26697334 |
| cg02121547 | cg04781080 | cg07519485 | cg11668053 | cg15844419 | cg18920097 | cg22632947 | cg26701815 |
| cg02192673 | cg04857710 | cg07584066 | cg11714502 | cg16003790 | cg19021236 | cg22702351 | cg26734888 |
| cg02230254 | cg04876069 | cg07610777 | cg11730254 | cg16009311 | cg19021985 | cg22917372 | cg26740937 |
| cg02261771 | cg04889069 | cg07612655 | cg11837181 | cg16079430 | cg19135362 | cg22928954 | cg26750617 |
| cg02264895 | cg04902871 | cg07629625 | cg11935831 | cg16101008 | cg19158754 | cg23049448 | cg26823505 |
| cg02284273 | cg04917181 | cg07669403 | cg12186618 | cg16118803 | cg19223119 | cg23287992 | cg26846409 |
| cg02289752 | cg04979435 | cg07674570 | cg12495090 | cg16120147 | cg19389372 | cg23319460 | cg26863172 |
| cg02457346 | cg04992150 | cg07683388 | cg12534390 | cg16121206 | cg19401111 | cg23429510 | cg26917745 |
| cg02464608 | cg04998327 | cg07812957 | cg12537405 | cg16148134 | cg19432993 | cg23521973 | cg27019019 |
| cg02499614 | cg05031011 | cg07875786 | cg12615766 | cg16170346 | cg19433091 | cg23548627 | cg27024272 |
| cg02580250 | cg05135176 | cg07915516 | cg12672189 | cg16180796 | cg19470812 | cg23574719 | cg27127887 |
| cg02594677 | cg05325887 | cg07967228 | cg12732514 | cg16231917 | cg19536929 | cg23634025 | cg27169020 |
| cg02597246 | cg05399718 | cg08000731 | cg12759554 | cg16310958 | cg19666541 | cg23648082 | cg27364244 |
| cg02638589 | cg05506011 | cg08010094 | cg12894984 | cg16312900 | cg19689322 | cg23663760 | cg27408897 |
| cg02852398 | cg05548190 | cg08351464 | cg13105599 | cg16327477 | cg19699056 | cg23740758 | cg27464846 |
| cg02888166 | cg05730108 | cg08355659 | cg13127920 | cg16435923 | cg19728382 | cg23758822 | cg27534828 |
| cg02962952 | cg05783384 | cg08415582 | cg13206220 | cg16541275 | cg19771372 | cg23896972 | cg27583010 |
| cg03020684 | cg05810848 | cg08496033 | cg13247663 | cg16620608 | cg19800670 | cg23974730 | cg27596890 |
| cg03044367 | cg05820861 | cg08504662 | cg13308137 | cg16649560 | cg19856897 | cg24035043 |            |
| cg03110082 | cg05938149 | cg08543278 | cg13330868 | cg16664193 | cg19866811 | cg24040502 |            |
| cg03188948 | cg06002687 | cg08717807 | cg13370460 | cg16725094 | cg19970908 | cg24266485 |            |
| cg03206537 | cg06015422 | cg08719486 | cg13492364 | cg16792363 | cg20043937 | cg24310959 |            |
| cg03269716 | cg06106242 | cg08734931 | cg13574337 | cg16817237 | cg20048521 | cg24433189 |            |

**Table S5: Hypomethylated CpGs used for Lasso regression analysis.**

---

|            |            |            |            |            |            |            |
|------------|------------|------------|------------|------------|------------|------------|
| cg18537454 | cg23447239 | cg11347165 | cg12126038 | cg23504522 | cg01498832 | cg03834411 |
| cg19946376 | cg04713352 | cg15580458 | cg27372170 | cg10954330 | cg13335329 | cg03940883 |
| cg10444224 | cg18054281 | cg08571738 | cg09300795 | cg02920045 | cg22337626 | cg25977769 |
| cg25026480 | cg07769015 | cg11418607 | cg18669823 | cg15124926 | cg00810710 | cg26786615 |
| cg07017331 | cg02837935 | cg14774440 | cg00638020 | cg06051619 | cg15909443 | cg21005683 |
| cg27623451 | cg01739354 | cg02254709 | cg17928268 | cg16260421 | cg20913114 | cg27288829 |
| cg17571559 | cg02196592 | cg14645856 | cg02224138 | cg26013992 | cg04132418 | cg02599361 |
| cg09277709 | cg16547341 | cg19345662 | cg03621001 | cg03318695 | cg00009523 | cg15800276 |
| cg27629454 | cg14189678 | cg19737225 | cg01556552 | cg04589021 | cg10771931 | cg13835168 |
